# Supplementary material for: A strategy for establishment of practical identification methods for Chinese patent medicine from systematic multi-component characterization to selective ion monitoring of chemical markers: Shuxiong tablet as a case study
Source: Royal Society of Chemistry journal article supplement (doi:10.1039/c6ra10883k), 2016-01-01
Supplement: c6ra10883k1.pdf [file c6ra10883k1.pdf]

<**RSC Advances**>

**Electronic Supplementary Information (ESI)**

**A strategy for establishment of practical identification methods for  
Chinese patent medicine from systematic multi-component  
characterization to selective ion monitoring of chemical markers:  
Shuxiong Tablet as a case study**

## Contents

### *Detailed information of 73 reference standards*

**Fig. S1** Comparison of six different UHPLC columns for the separation of multi-components from SXT in the negative (ES-) and positive (ES+) ion modes, respectively.

**Fig. S2** Comparison of the effluence of different compositions of mobile phase on the resolution and ion response of SXT componnets in the both modes. **ACN**: acetonitrile; **FA**: formic acid; **AF**: ammonium formate.

**Fig. S3** Comparison of the influence of different column temperatrue on the separation of compounds from SXT in both inization modes.

**Fig. S4** Comparison of the influence of different flow rates on the separation of compounds from SXT in both ionization modes.

**Fig. S5** Comparison of the peak areas of ten index compounds obtained under five different spray voltages (1.5 kV to 3.5 kV).

**Fig. S6** The Fast DDA-MS<sup>2</sup> spectra of 8 representative compounds (noto-R1, Rg1, Re, Rb1, Rd, HSYA, AnHSYB and kaempferol 3-*O*-rutinoside) obtained in negative mode under constant collision energies rangeing from 10 V to 110 V.

**Fig. S7** The Fast DDA-MS<sup>2</sup> spectra of 2 representative compounds (*Z*-ligustilide and levistolide A) obtained in positive mode under constant collision energies ranging from 10 V to 110 V.

**Fig. S8** The Fast DDA-MS<sup>2</sup> spectra of representative compounds in optimzied CE Noto-R1, Rg1, Re, Rb1, Rd, HSYA, AnHSYB, and kaempferol 3-*O*-rutinoside, in ES-; *Z*-ligustilide and levistolide A in ES+.

**Fig. S9** The MS<sup>2</sup> spectra of quercetin-3-*O*- $\beta$ -D-glucoside (**84**) and quercetin-7-*O*- $\beta$ -D-glucoside (**83**).

**Fig. S10** The MS<sup>2</sup> spectra of 6-hydroxykaempferol-3,6-di-*O*- $\beta$ -D-glucoside (**59**) and kaempferol-3-*O*- $\beta$ -D-glucosyl-(1 $\rightarrow$ 2)- $\beta$ -D-glucoside (**75**).

**Fig. S11** The MS and MS<sup>2</sup> spectra of representative ginsenosides **162** (PPT type), **180** (malonyl substituted) and **156** (C17-side chain varied).

**Fig. S12** The MS and MS<sup>2</sup> spectra of a representative unknown FOG compound **27**.

**Fig. S13** Enlarged CID-MS/MS spectra of four FOG reference standards: 6-hydroxy kaempferol-3,6-di-*O*- $\beta$ -D-glucoside (**59**), 6-hydroxykaempferol-3-*O*- $\beta$ -D-glucoside (**77**), quercetin-7-*O*- $\beta$ -D-glucoside (**83**), and quercetin-3-*O*- $\beta$ -D-glucoside (**84**).

**Fig. S14** The MS and MS<sup>2</sup> spectra of representative QCG (**61**), phenolic acid (**22**), and phthalide (**89**) compounds in SXT.

**Fig. S15** The MS<sup>2</sup> spectra of four mono-*O*-caffeoylquinic acids, including compounds **9**, **14**, **33** and **37**. Abundant product ions at *m/z* 173.04 were only observed in **37**, in consistent with the reported spectrum of 4-*O*-caffeoylquinic acid. The intensity ratio of product ions *m/z* 179.04 to *m/z* 191.06 was larger in **14** (5-*O*-caffeoylquinic acid) than **33** (3-*O*-caffeoylquinic acid).

**Fig. S16** A 2D plot of retention time (*t<sub>R</sub>*) versus mass-to-charge (*m/z*) of the precursor ions of 250 compounds characterized from SXT based on the structure subclasses.

**Fig. S17** The MS fingerprint of 20 batches of *Carthamus tinctoris* samples: showing the presence of hydroxysafflor yellow A (HSYA), anhydrosafflor yellow B (AnHSYB) and kaempferol-3-*O*-rutinoside. These data have been reported in our recent study in literature [7].

**Fig. S18** The base-peak chromatograms of a home-made SXT sample and three compositional drugs: showing the presence of 11 selected chemical markers for

authentication of SXT. FA: ferulic acid; KR: kaempferol-3-*O*-rutinoside; ZL: Z-ligustilide; LA: levistolide A.

**Fig. S19** Exacted ion chromatograms (EIC) of eleven chemical markers determined with the home-made SXT sample on the QTOF mass spectrometer under the SIM chromatographic condition (A) and fingerprinting conditions of a Notoginseng total saponins preparation, CF, or CR (B). EIC of each individual drug under the corresponding fingerprinting condition (NRR, CF, or CR) is shown as (C). The gradient elution programs were by reference to literature [7,37,46].

**Fig. S20** Comparison of the signal to noise ratio (S/N) of six reference standards (ferulic acid, kaempferol-3-*O*-rutinoside, noto-R1, Rb1, HSYA, and AnHSYB) at three concentration levels on UPLC-QTOF and UPLC-QDa by the individual SIM.

**Fig. S21** The SIM spectra of ten batches of commercial SXT samples (S1–S4, S6–S8, and S10–S12) determined on both UPLC-QTOF and UPLC-QDa.

**Table S1** Detailed information of the 251 compounds characterized from SXT by UHPLC/QTOF-Fast DDA.

### ***Detailed information of 73 reference standards***

A total of 73 reference standards were used for characterization of multi-components in SXT. Amongst them, malonyl ginsenoside-Rb<sub>1</sub> (**176**) and -Rd (**198**) were isolated from the root of *P. ginseng*. The other saponin compounds, including notoginsenoside-R<sub>1</sub> (**118**), -R<sub>2</sub> (**166**), -R<sub>3</sub> (**104**), -R<sub>4</sub> (**161**), -G (**136**), -K (**202**), -M (**109**), -T (**158**), -T<sub>5</sub> (**210**), 20(*R*)-noto-R<sub>2</sub> (**170**), ginsenoside-Ra<sub>3</sub> (**167**), -Rb<sub>1</sub> (**173**), -Rb<sub>2</sub> (**184**), -Rc (**178**), -Rd (**196**), -Re (**127**), -Re<sub>3</sub> (**107**), -Rf (**160**), -Rg<sub>1</sub> (**126**), -Rg<sub>2</sub> (**172**), -Ro (**181**), -F<sub>2</sub> (**217**), -Rk<sub>3</sub> (**213**), 20(*S*)-Rg<sub>3</sub> (**223**), 20(*R*)-Rg<sub>3</sub> (**227**), 20-*O*-Glc-Rf (**115**), 20(*S*)-Rh<sub>1</sub> (**174**), 20(*R*)-Rh<sub>1</sub> (**179**), 20(*S*)-Rh<sub>2</sub> (**247**), 20(*R*)-Rh<sub>2</sub> (**248**), 20(*S*)-sanchirinioside-A<sub>3</sub> (**145**), -A<sub>4</sub> (**137**), -A<sub>5</sub> (**122**), vinaginsenoside-R<sub>4</sub> (**151**), 5,6-didehydroginsenoside-Rb<sub>1</sub> (**169**), compound K (**245**), and 20(*S*)-PPT (**234**), were isolated from the root of *P. notoginseng*. Cis-*p*-coumaric acid-4-*O*-β-D-glucoside (**32**), trans-*p*-coumaric acid-4-*O*-β-D-glucoside (**15**), syringin (**31**), saffloquinoside A (**95**), hydroxysafflor yellow A (**39**, HSYA), isosafflomin C (**119**), safflomin C (**125**), anhydrosafflor yellow B (**91**, AnHSYB), quercetin (**140**), quercetin-7-*O*-β-D-glucoside (**83**), quercetin-3-*O*-β-D-glucoside (**84**), kaempferol-3-*O*-β-D-glucoside (**99**), (2*S*)-4',5,6,7-tetrahydroxy-flavanone-6-*O*-β-D-glucoside (**88**), 5,7,4'-trihydroxy-6-methoxyflavonol-3-*O*-β-D-rutinoside (**93**), 6-hydroxykaempferol-3-*O*-β-D-glucoside (**77**), kaempferol-3-*O*-rutinoside (**90**, KR), kaempferol-3-*O*-β-D-glucosyl-(1→2)-β-D-glucoside (**75**), rutin (**81**), 6-hydroxyapigenin-6-*O*-β-D-glucoside-7-*O*-β-D-glucuronide (**63**), 6-hydroxykaempferol-3,6-di-*O*-β-D-glucoside (**59**), 6-hydroxykaempferol-3-*O*-β-D-rutinoside-6-*O*-β-D-glucoside (**58**), 6-hydroxykaempferol-3,6,7-tri-*O*-β-D-glucoside (**25**), and (2*E*,8*E*,10*E*)-12*R*-tridecatriene-4,6-diyne-1,12,13-triol-1-*O*-β-D-glucoside (**71**), were isolated from the floret of *C. tinctorius*. Four phthalides, including *Z*-ligustilide (**230**, ZL), senkyunolide I (**114**), senkyunolide H (**124**), and levistolide A (**250**, LA), were isolated from *L. chuanxiong*. Neochlorogenic acid (**14**), chlorogenic acid (**33**), 3,5-di-*O*-caffeoylquinic acid (**100**), ferulic acid (**80**, FA), kaempferol (**163**), luteolin (**139**), and luteolin-7-*O*-β-D-glucoside (**85**), were purchased from National Institute for the Control of

Pharmaceutical and Biological Products (Beijing, China) or Shanghai U-sea Biotech Co., Ltd. (Shanghai, China).

**ES-**

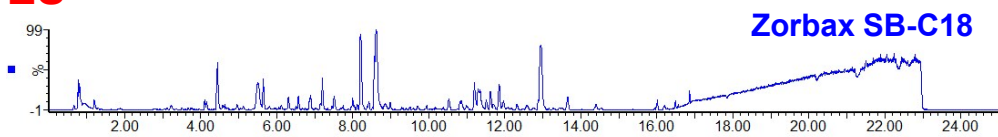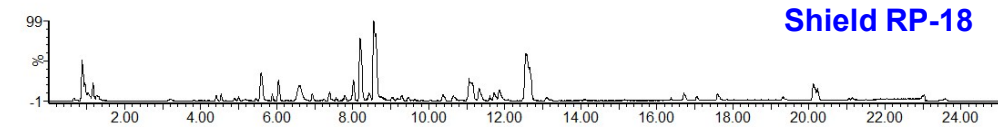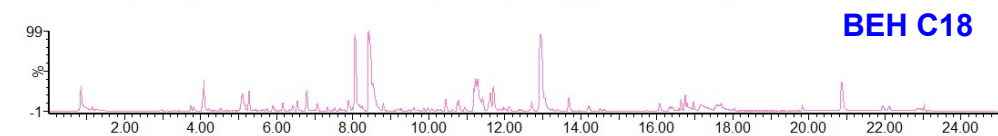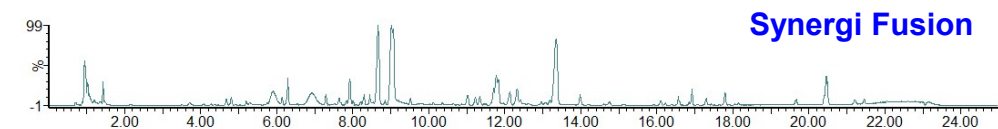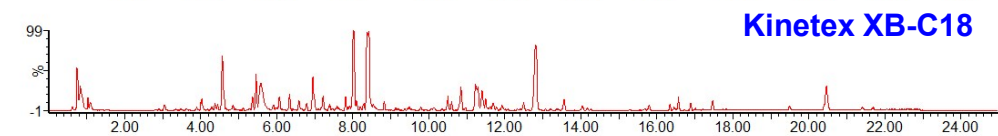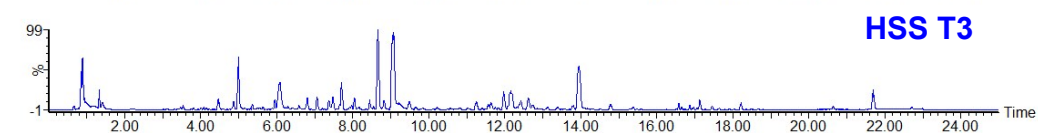

**(Continued)**

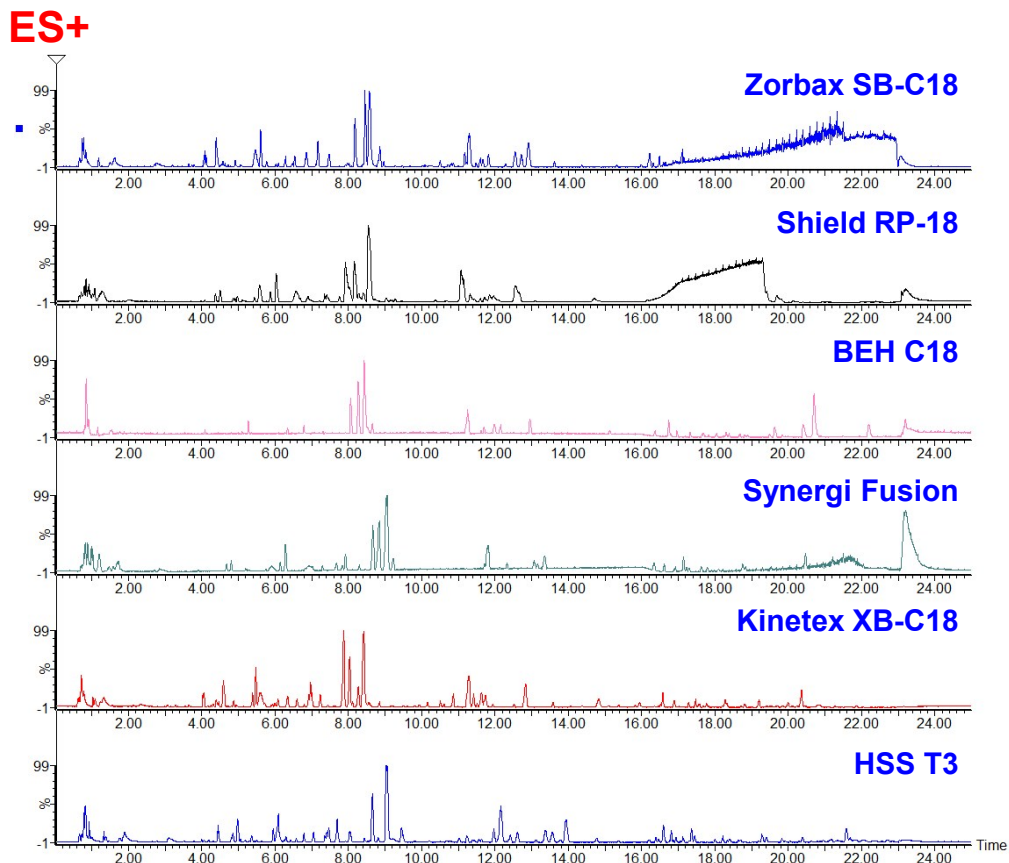

**Fig. S1** Comparison of six different UHPLC columns for the separation of multi-components from SXT in the negative (ES-) and positive (ES+) ion modes, respectively.



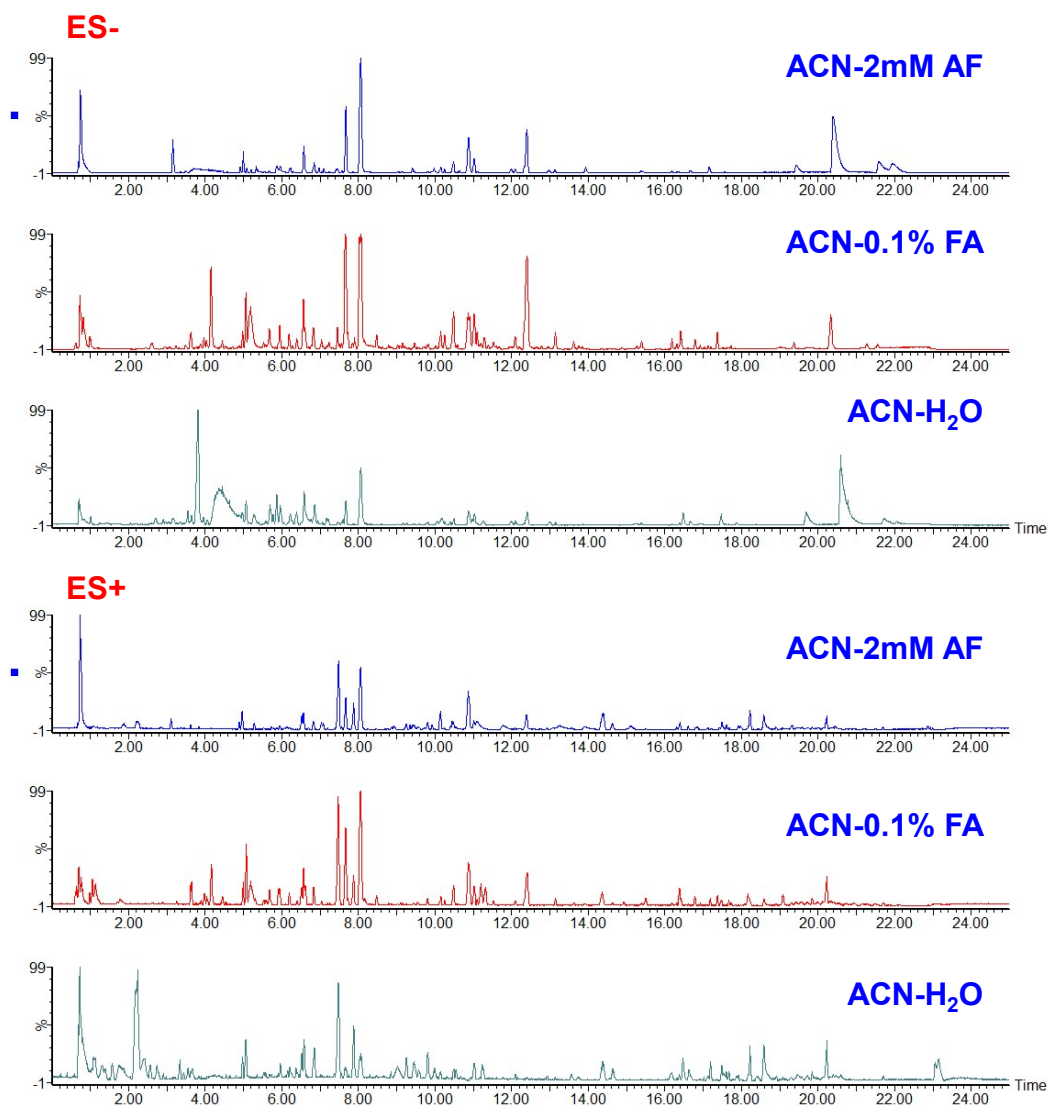

**Fig. S2** Comparison of the effluence of different compositions of mobile phase on the resolution and ion response of SXT components in the both modes. **ACN**: acetonitrile; **FA**: formic acid; **AF**: ammonium formate.

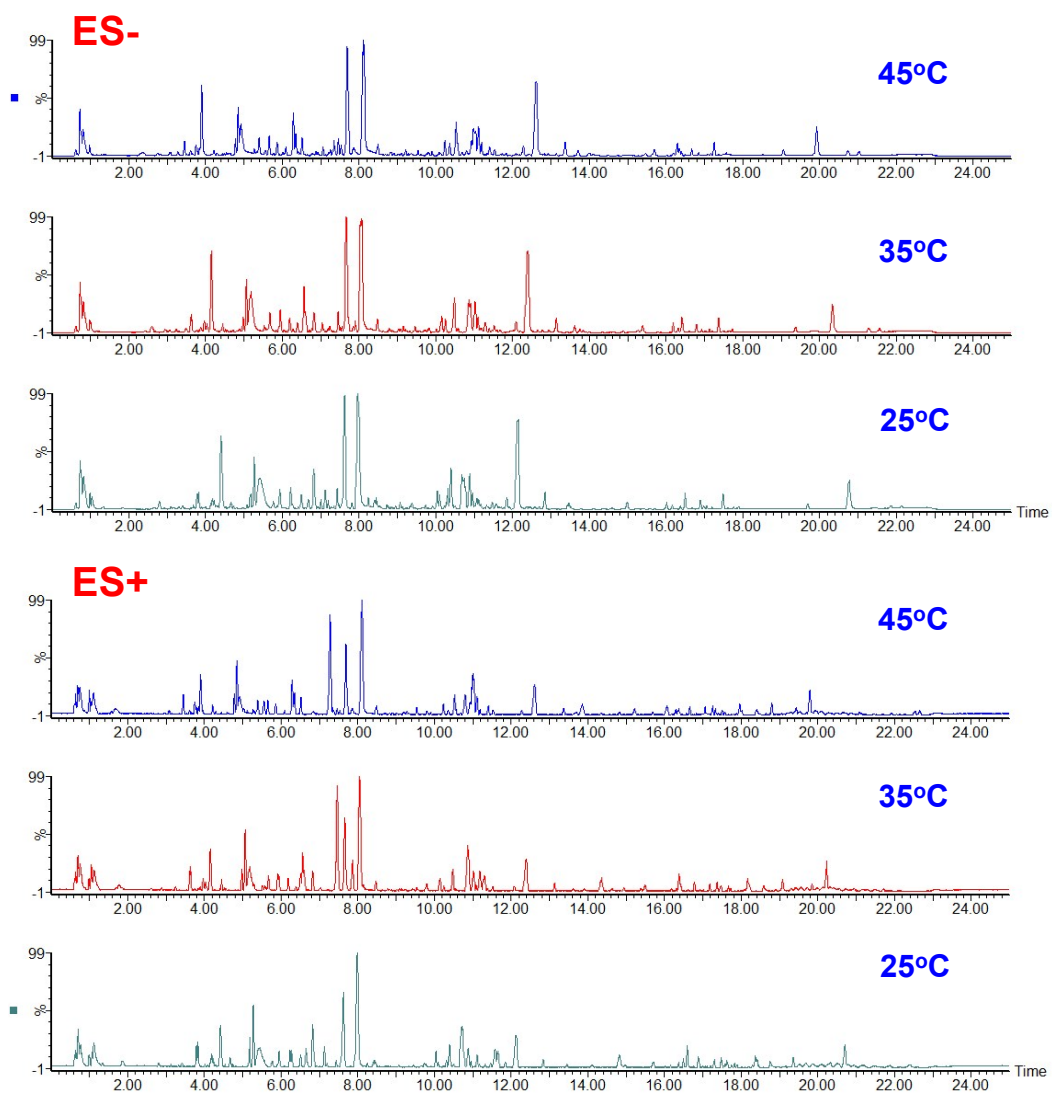

**Fig. S3** Comparison of the influence of different column temperature on the separation of compounds from SXT in both ionization modes.

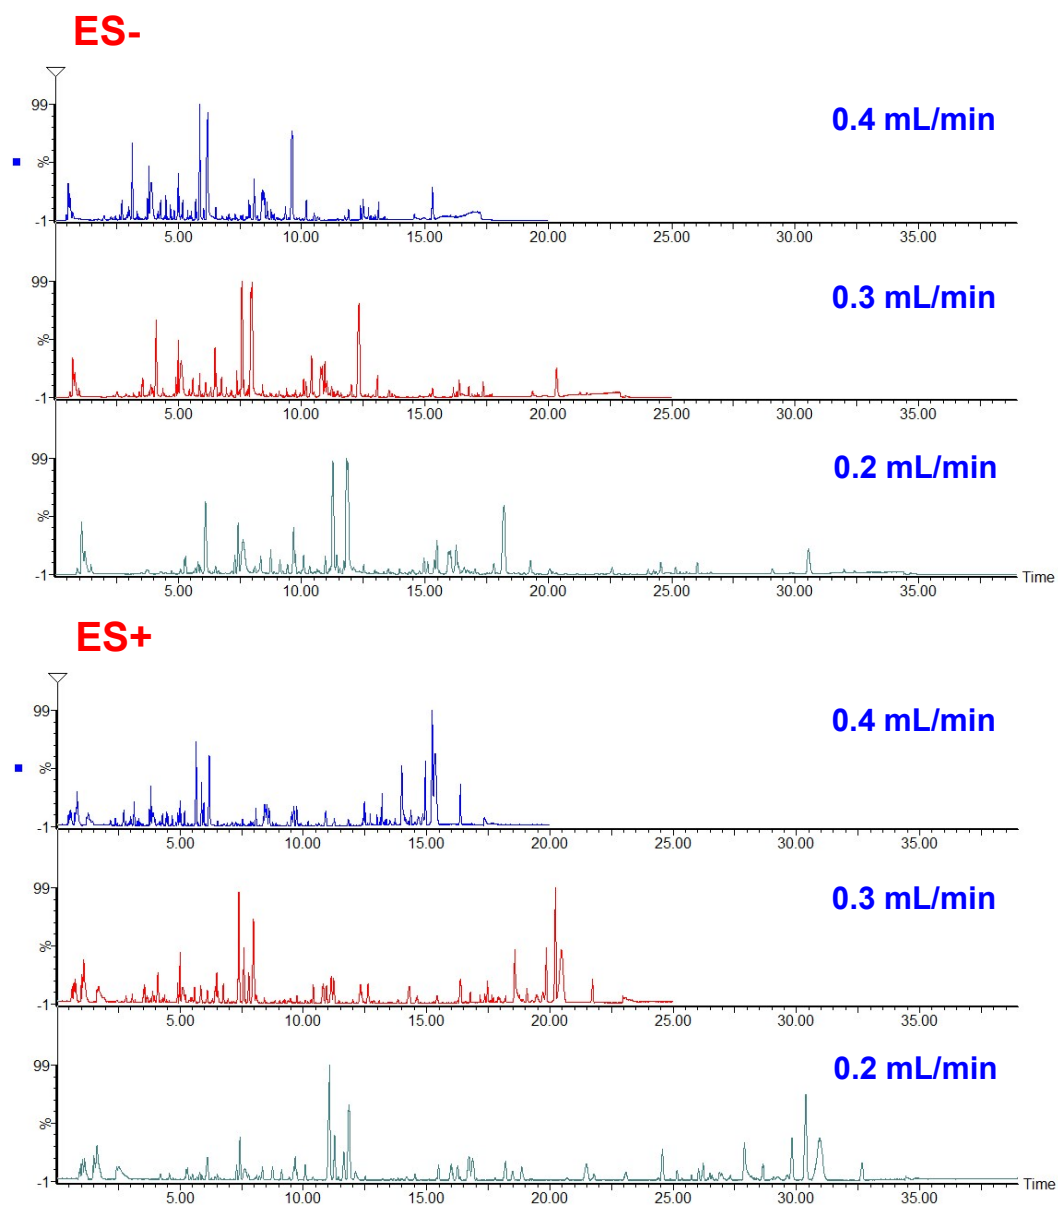

**Fig. S4** Comparison of the influence of different flow rates on the separation of compounds from SXT in both ionization modes.

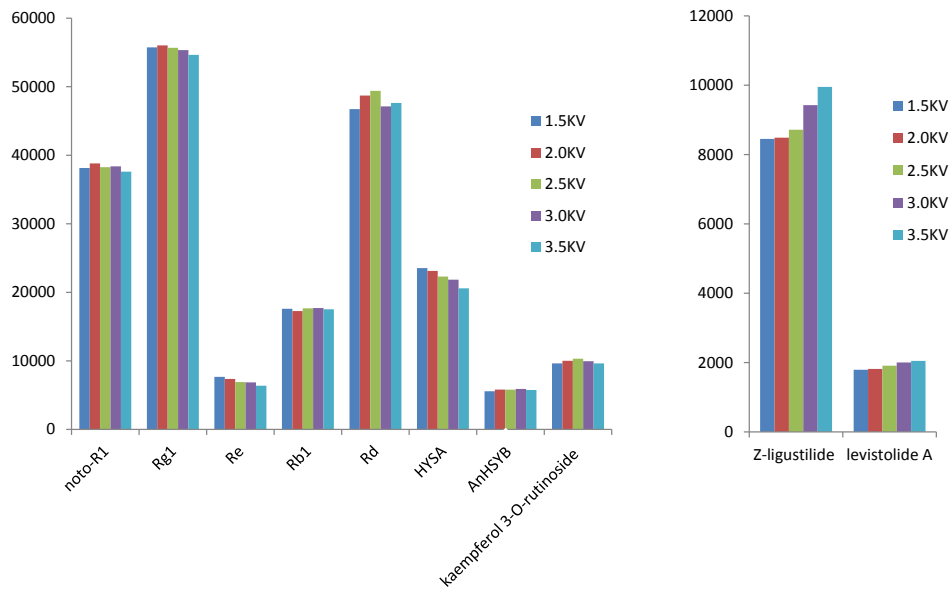

**Fig. S5** Comparison of the peak areas of ten index compounds obtained under five different spray voltages (1.5 kV to 3.5 kV).

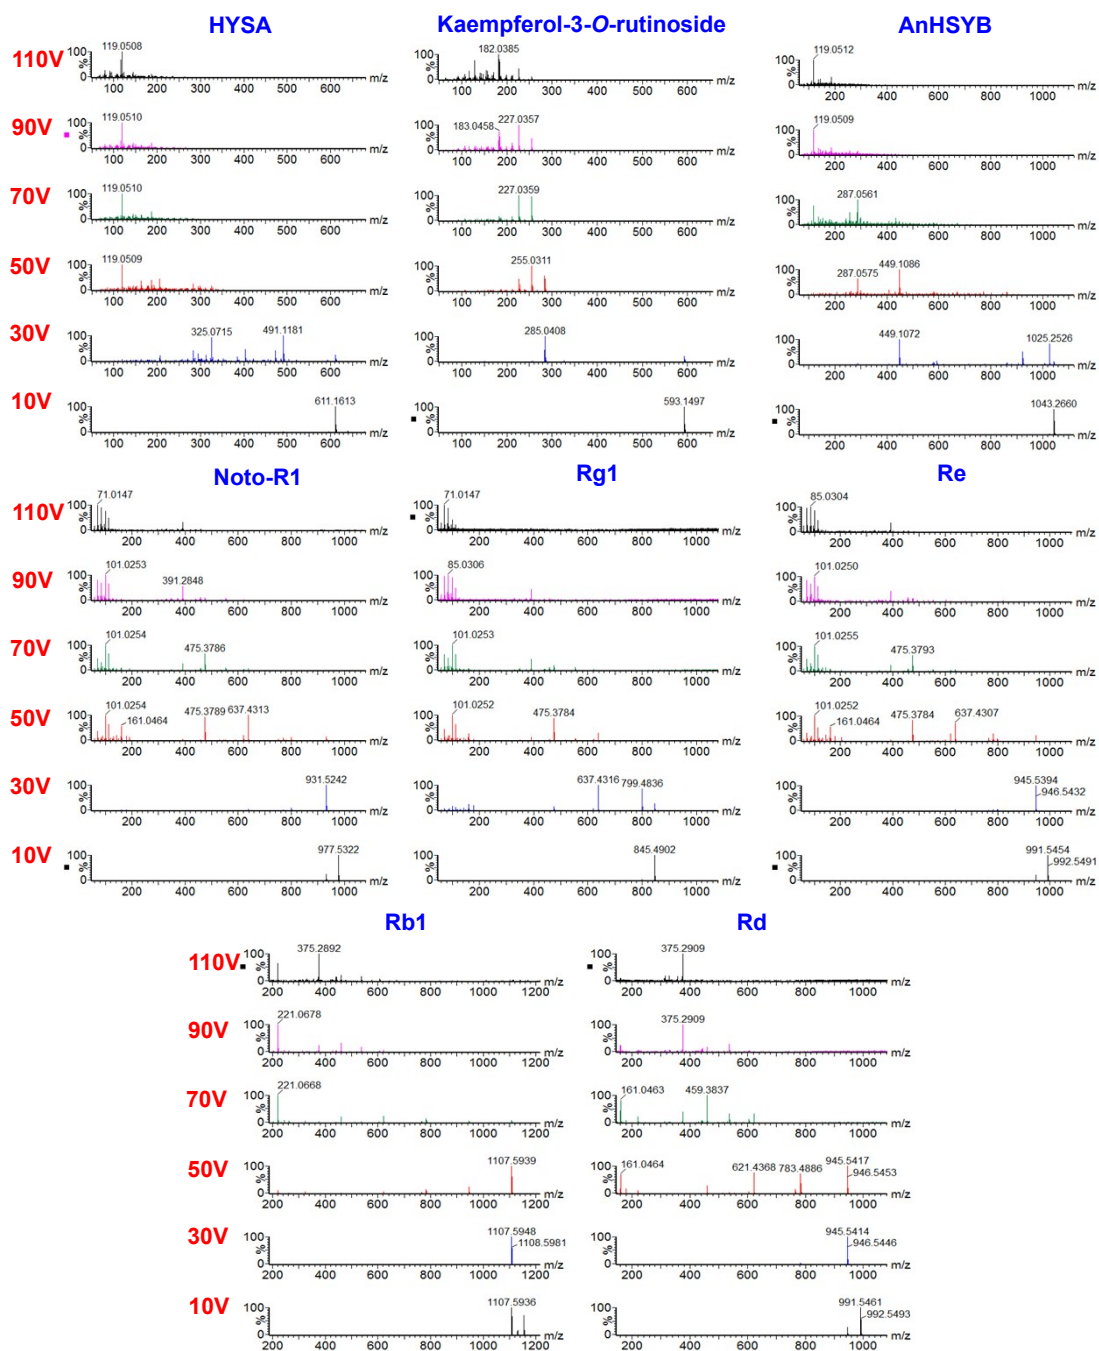

**Fig. S6** The Fast DDA-MS<sup>2</sup> spectra of 8 representative compounds (noto-R1, Rg1, Re, Rb1, Rd, HSYA, AnHSYB and kaempferol 3-*O*-rutinoside) obtained in negative mode under constant collision energies ranging from 10 V to 110 V.

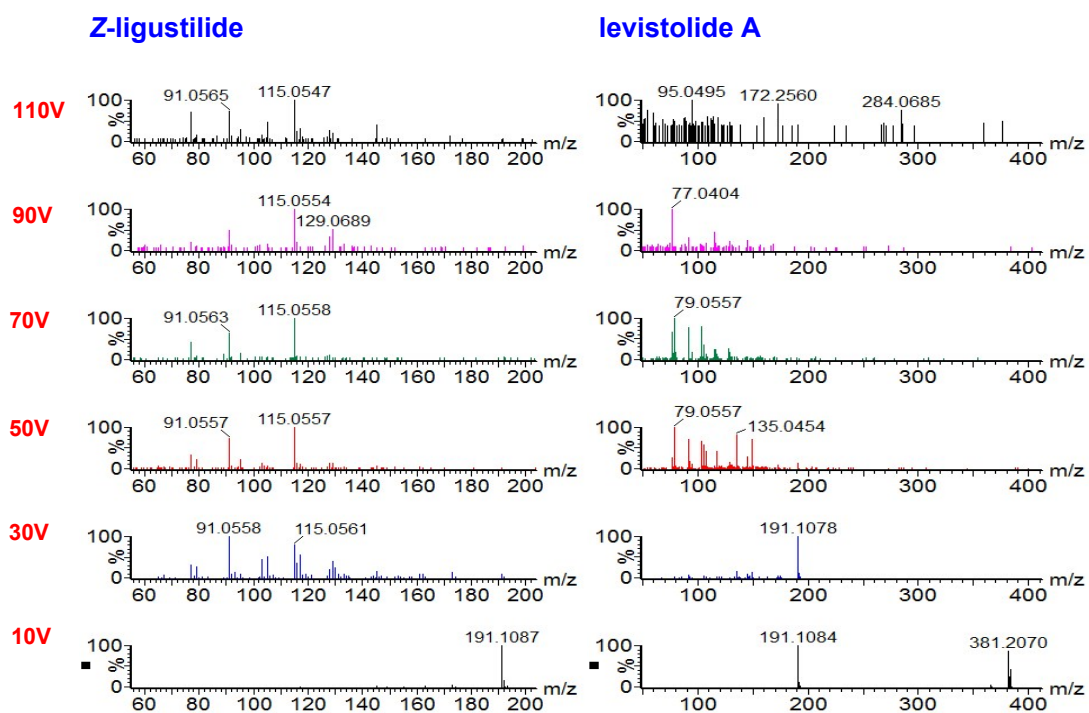

**Fig. S7** The Fast DDA-MS<sup>2</sup> spectra of 2 representative compounds (Z-ligustilide and levistolide A) obtained in ES<sup>+</sup> under constant collision energies ranging from 10 V to 110 V.

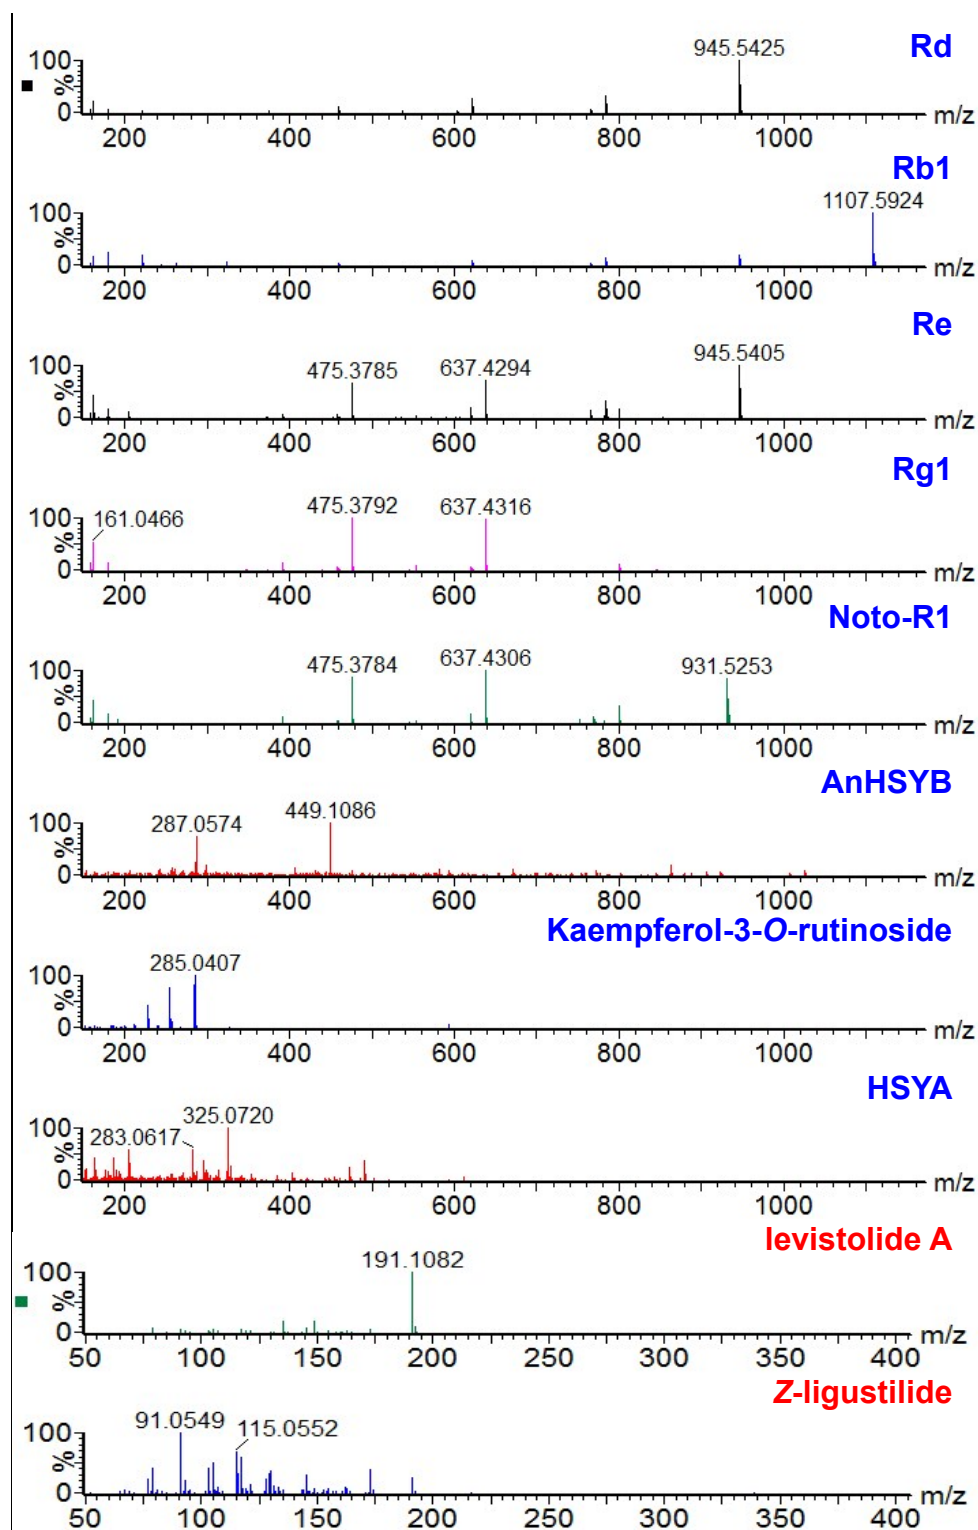

**Fig. S8** The Fast DDA-MS<sup>2</sup> spectra of representative compounds in optimized CE Noto-R1, Rg1, Re, Rb1, Rd, HSYA, AnHSYB, and kaempferol 3-*O*-rutinoside, in ES<sup>-</sup>; Z-ligustilide and levistolide A in ES<sup>+</sup>.

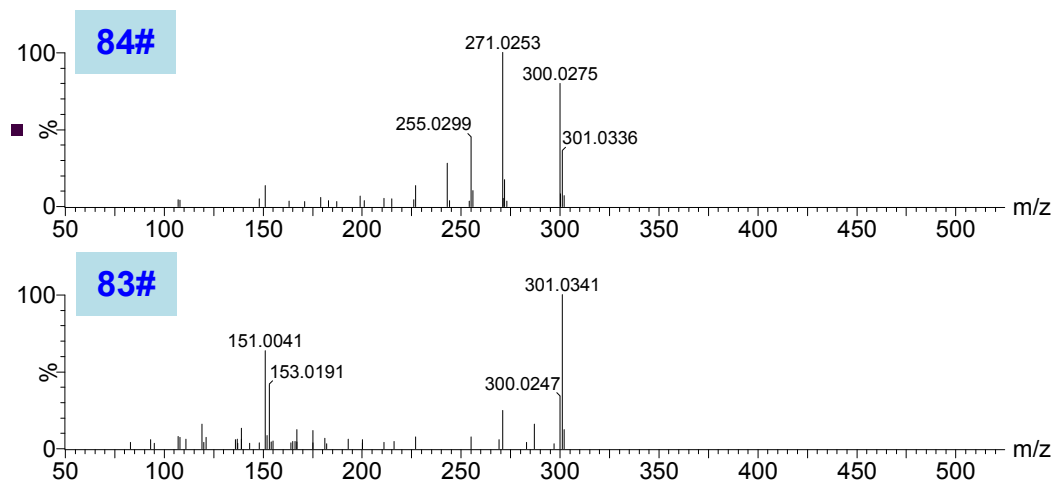

**Fig. S9** The MS<sup>2</sup> spectra of quercetin-3-*O*-β-D-glucoside (**84**) and quercetin-7-*O*-β-D-glucoside (**83**).

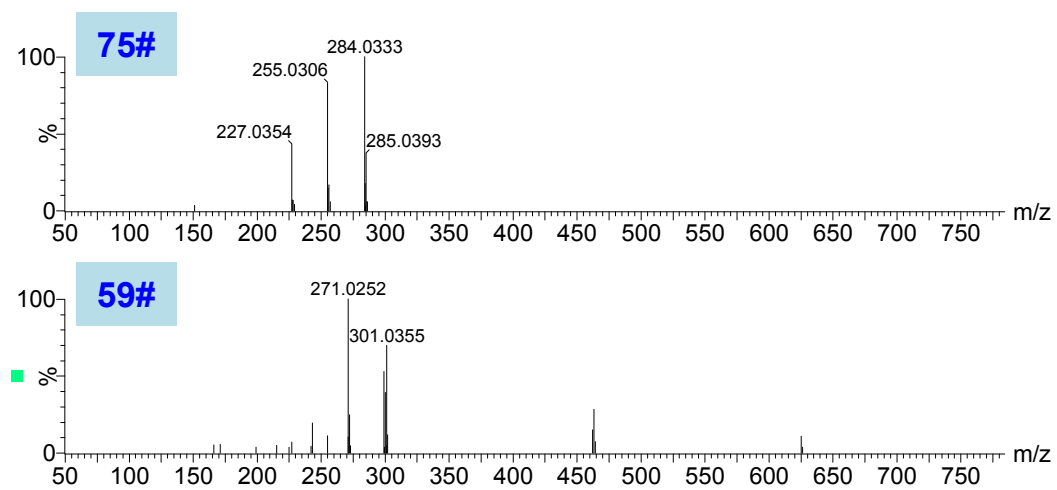

**Fig. S10** The MS<sup>2</sup> spectra of kaempferol-3-*O*-β-D-glucosyl(1→2)-β-D-glucoside (**75**) and 6-hydroxykaempferol-3,6-di-*O*-β-D-glucoside (**59**).



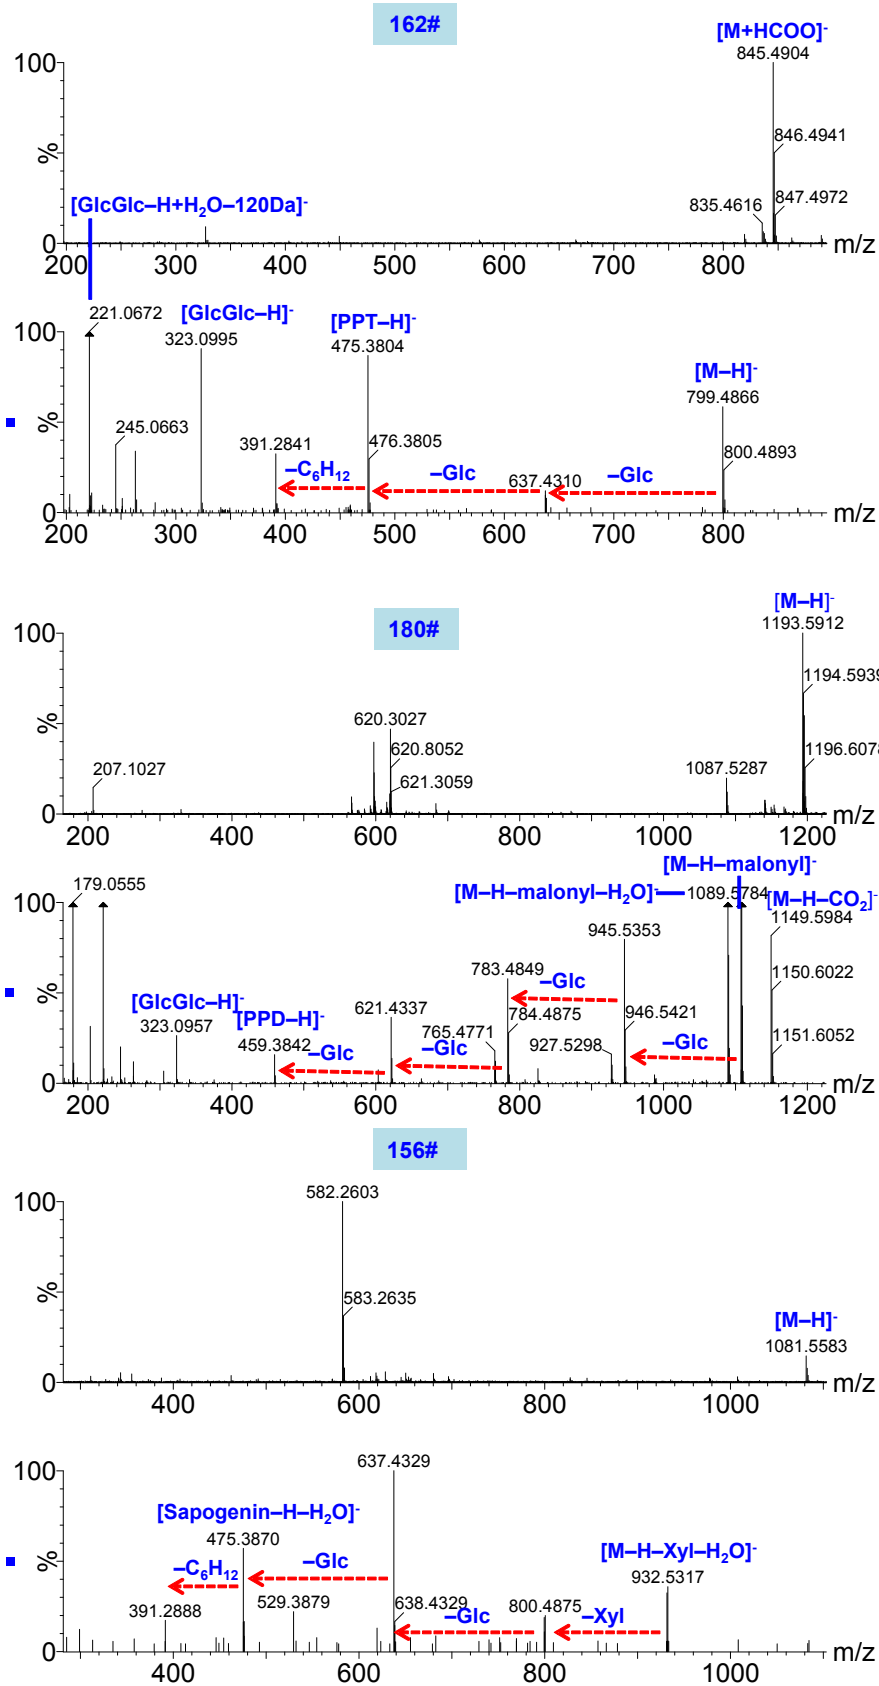

**Fig. S11** The MS and MS<sup>2</sup> spectra of representative ginsenosides **162** (PPT type), **180** (malonyl substituted) and **156** (C17-side chain varied).

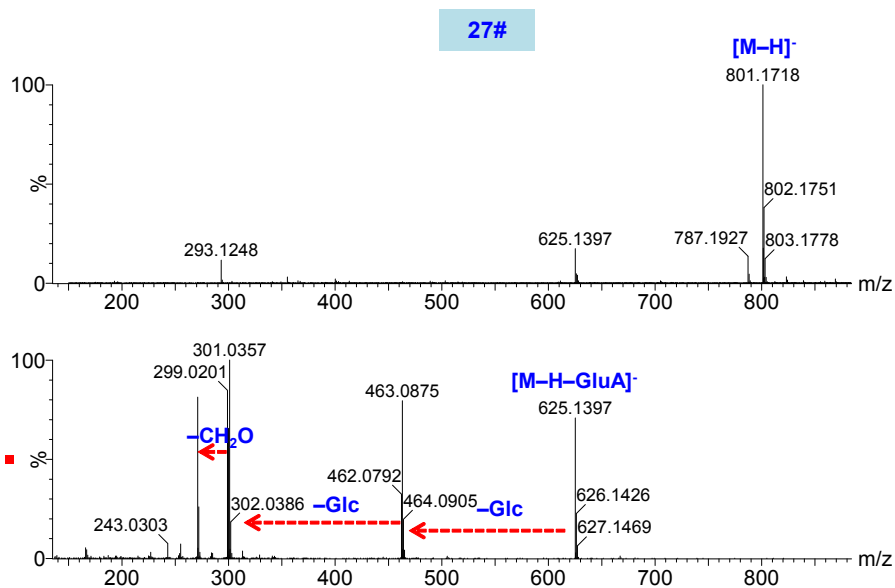

**Fig. S12** The MS and MS<sup>2</sup> spectra of a representative unknown FOG compound **27**.

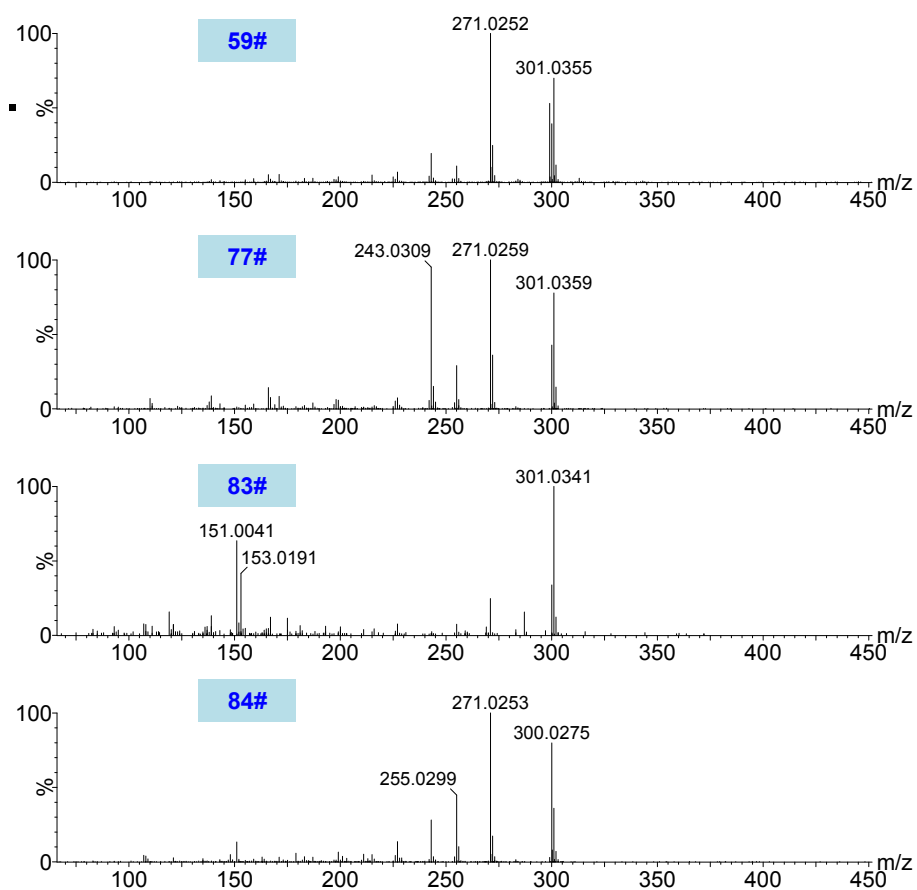

**Fig. S13** Enlarged CID-MS/MS spectra of four FOG reference standards: 6-hydroxy kaempferol-3,6-di-*O*- $\beta$ -D-glucoside (**59**), 6-hydroxykaempferol-3-*O*- $\beta$ -D-glucoside (**77**), quercetin-7-*O*- $\beta$ -D-glucoside (**83**), and quercetin-3-*O*- $\beta$ -D-glucoside (**84**).

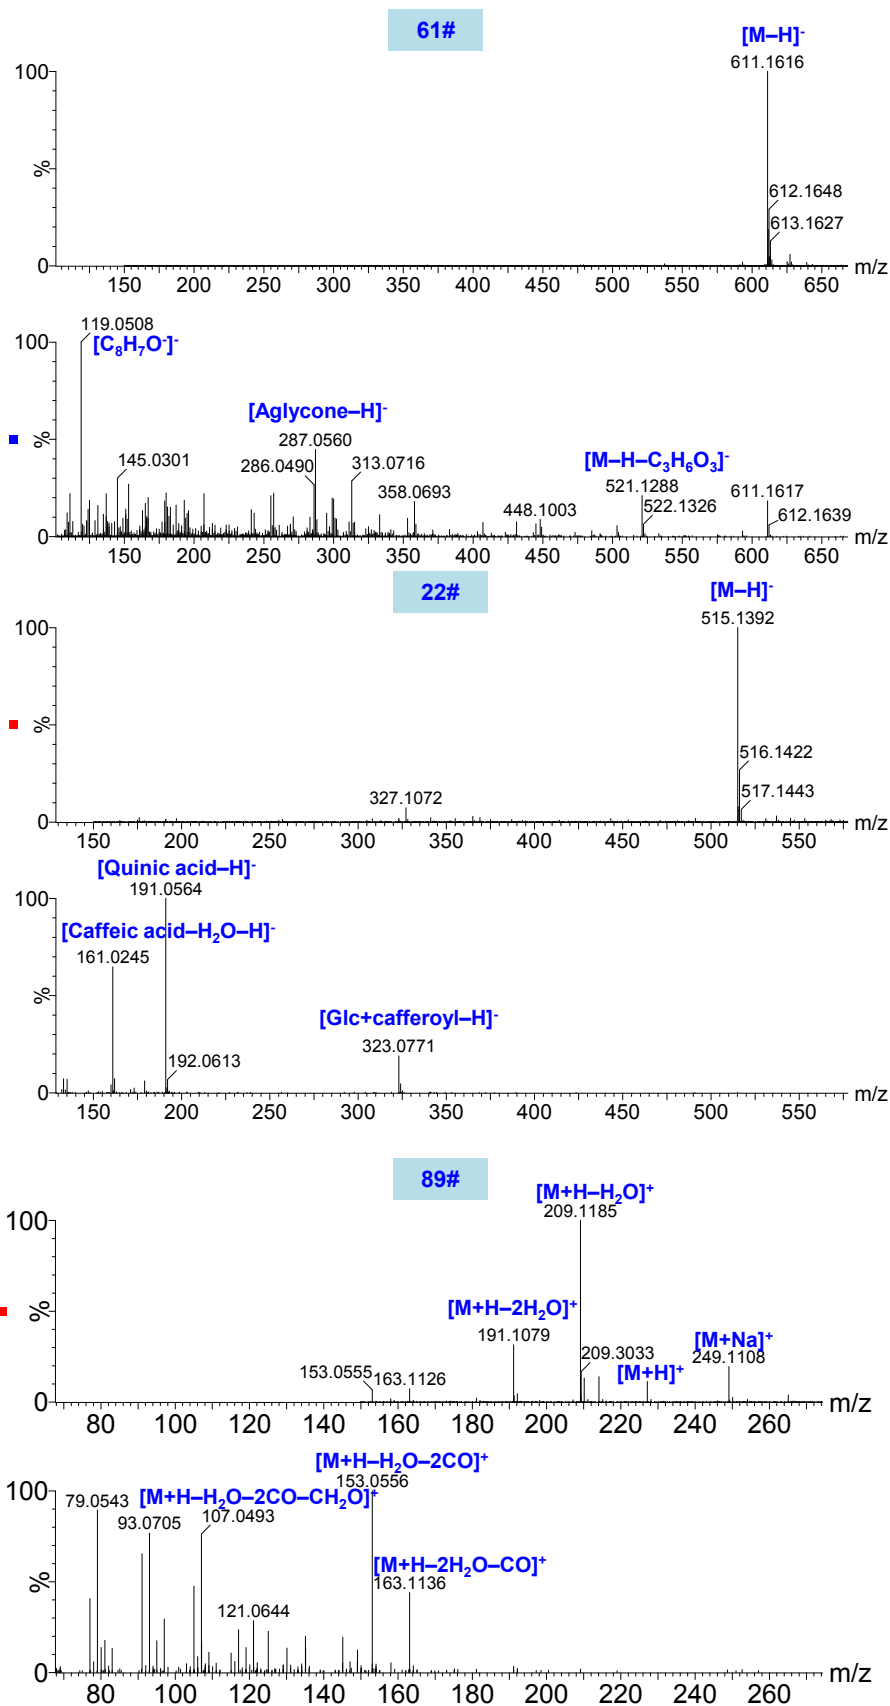

**Fig. S14** The MS and MS<sup>2</sup> spectra of representative QCG (**61**), phenolic acid (**22**), and phthalide (**89**) compounds in SXT.

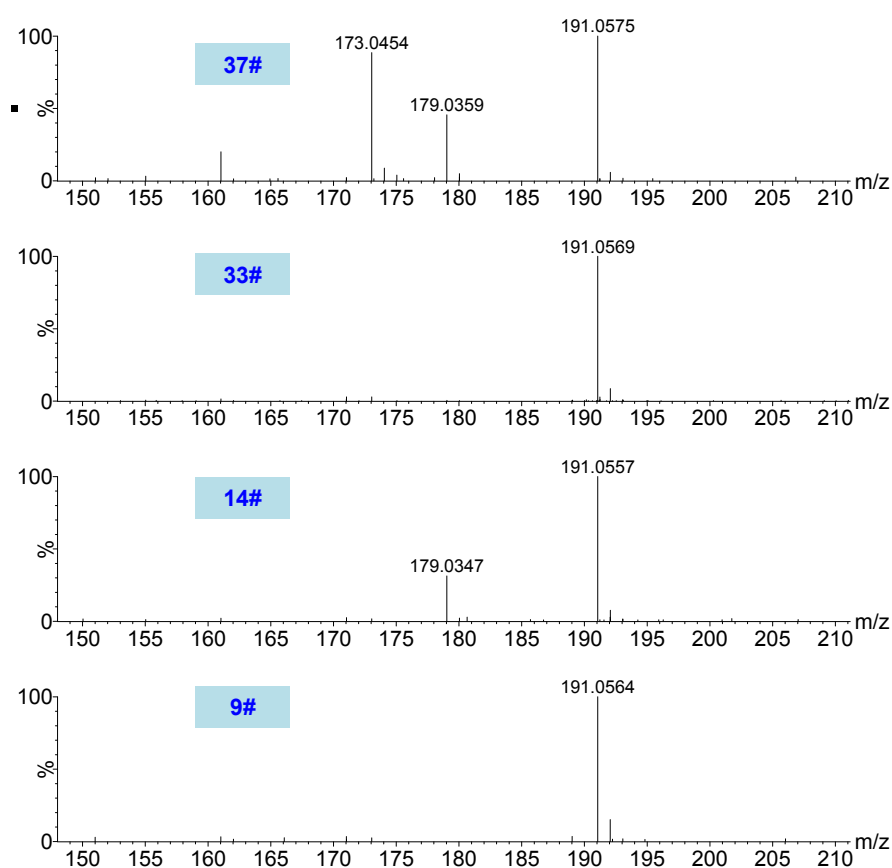

**Fig. S15** The MS<sup>2</sup> spectra of four mono-*O*-caffeoylquinic acids, including compounds **9**, **14**, **33** and **37**. Abundant product ions at *m/z* 173.04 were only observed in **37**, in consistent with the reported spectrum of 4-*O*-caffeoylquinic acid. The intensity ratio of product ions *m/z* 179.04 to *m/z* 191.06 was larger in **14** (5-*O*-caffeoylquinic acid) than **33** (3-*O*-caffeoylquinic acid).

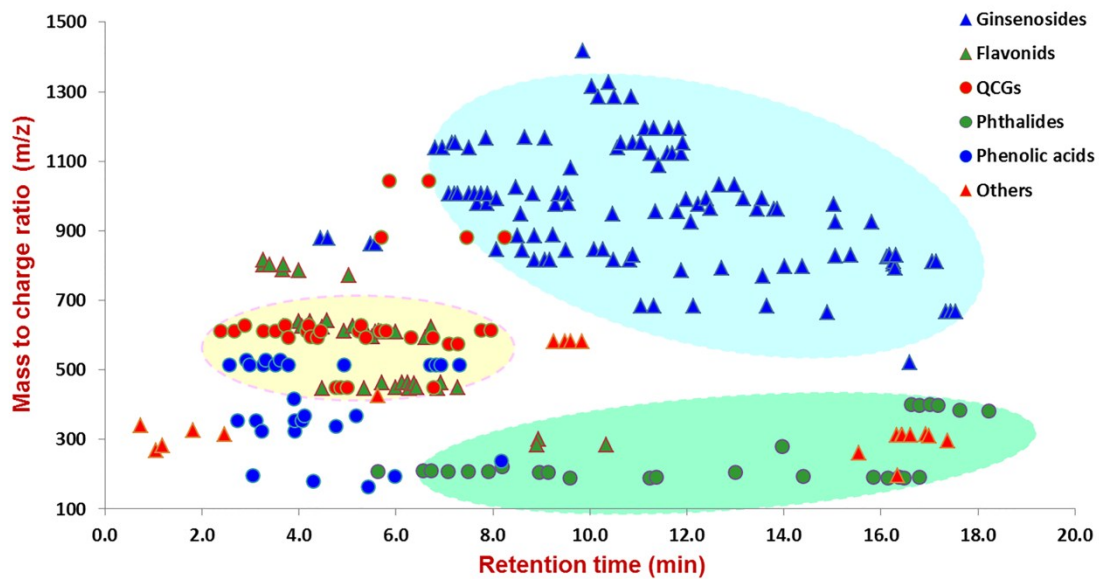

**Fig. S16** A 2D plot of retention time ( $t_R$ ) versus mass-to-charge ( $m/z$ ) of the precursor ions of 250 compounds characterized from SXT based on the structure subclasses.

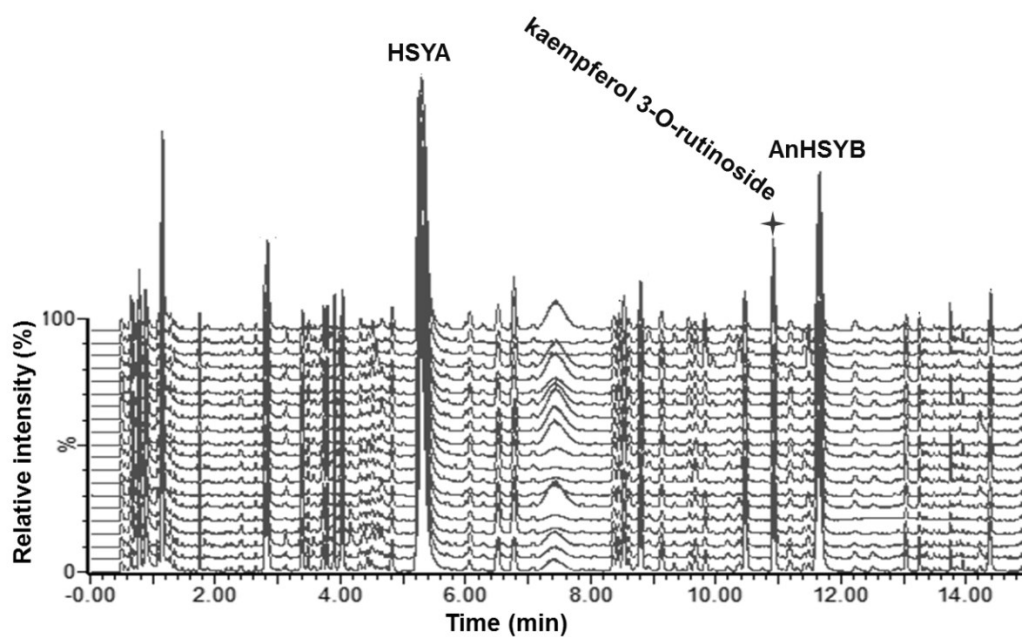

**Fig. S17** The MS fingerprint of 20 batches of *Carthamus tinctoris* samples: showing the presence of hydroxysafflor yellow A (HSYA), anhydrosafflor yellow B (AnHSYB) and kaempferol-3-*O*-rutinoside. These data have been reported in our recent study in literature [7].

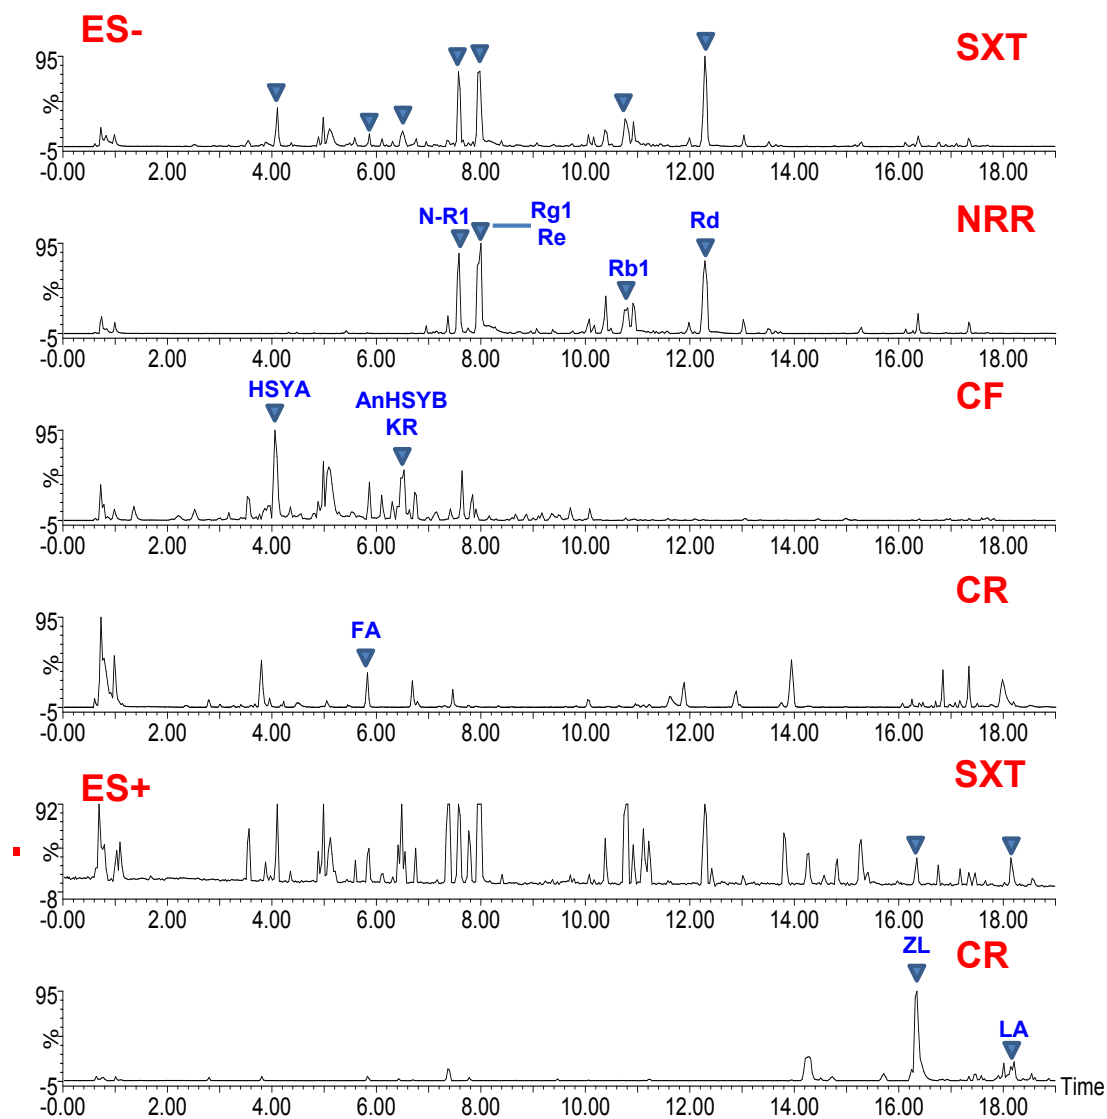

**Fig. S18** The base-peak chromatograms of a home-made SXT sample and three compositional drugs: showing the presence of 11 selected chemical markers for authentication of SXT. FA: ferulic acid; KR: kaempferol-3-*O*-rutinoside; ZL: Z-ligustilide; LA: levistolide A.

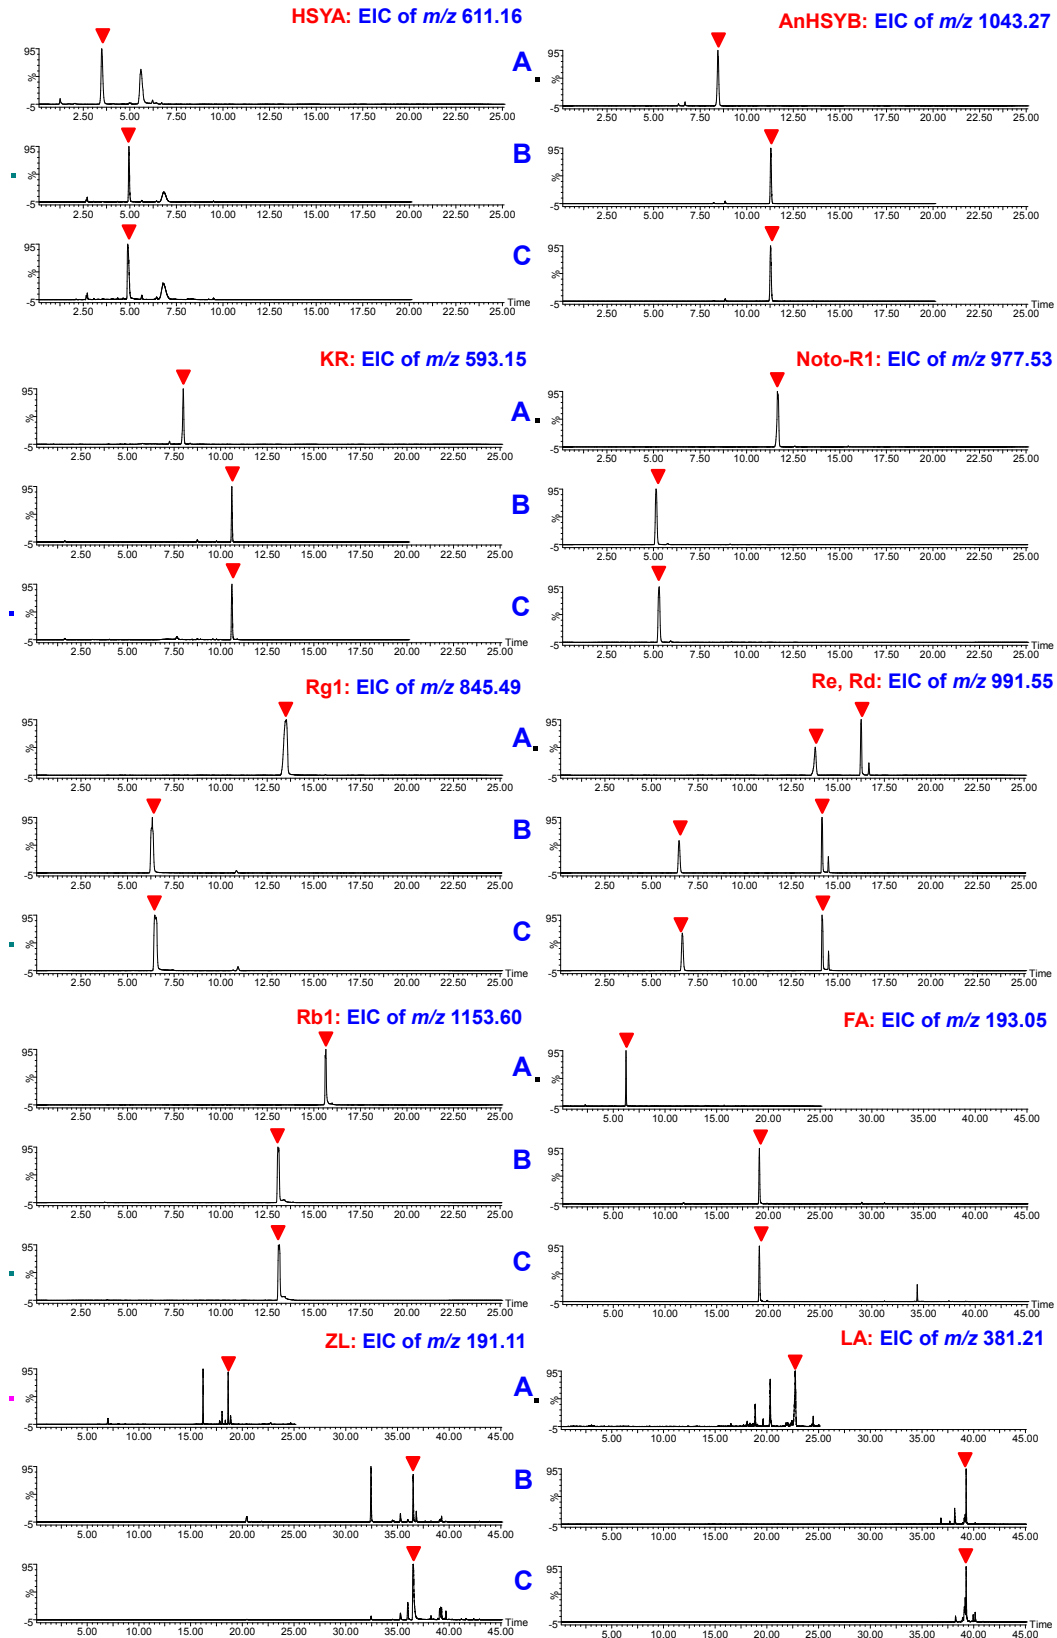

**Fig. S19** Exacted ion chromatograms (EIC) of eleven chemical markers determined with the home-made SXT sample on the QTOF mass spectrometer under the SIM chromatographic condition (A) and fingerprinting conditions of a Notoginseng total

saponins preparation, CF, or CR (B). EIC of each individual drug under the corresponding fingerprinting condition (NRR, CF, or CR) is shown as (C). The gradient elution programs were by reference to literature [7,37,46].

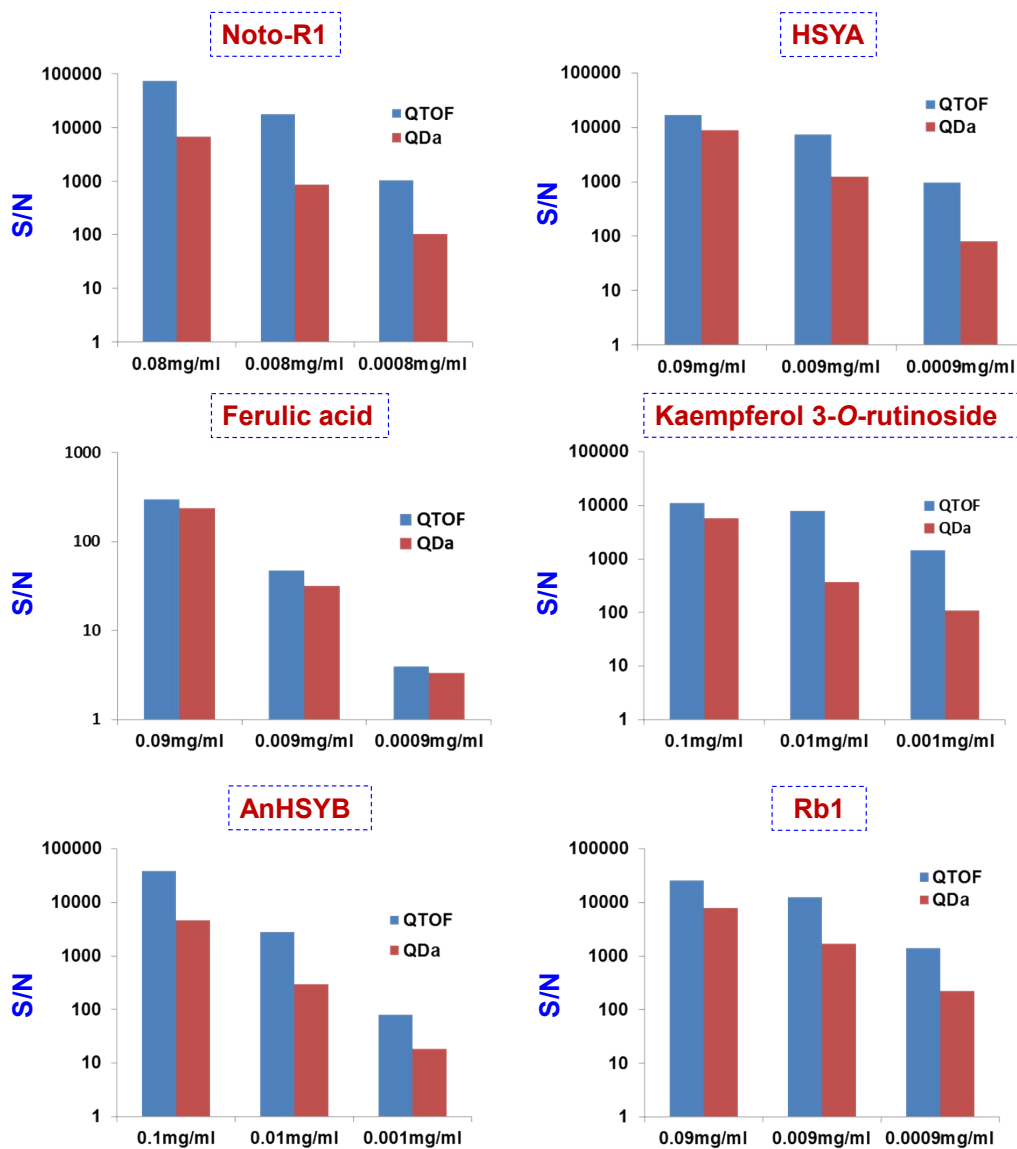

**Fig. S20** Comparison of the signal to noise ratio (S/N) of six reference standards (ferulic acid, kaempferol-3-*O*-rutinoside, noto-R1, Rb1, HSYA, and AnHSYB) at three concentration levels on UPLC-QTOF and UPLC-QDa by the individual SIM.



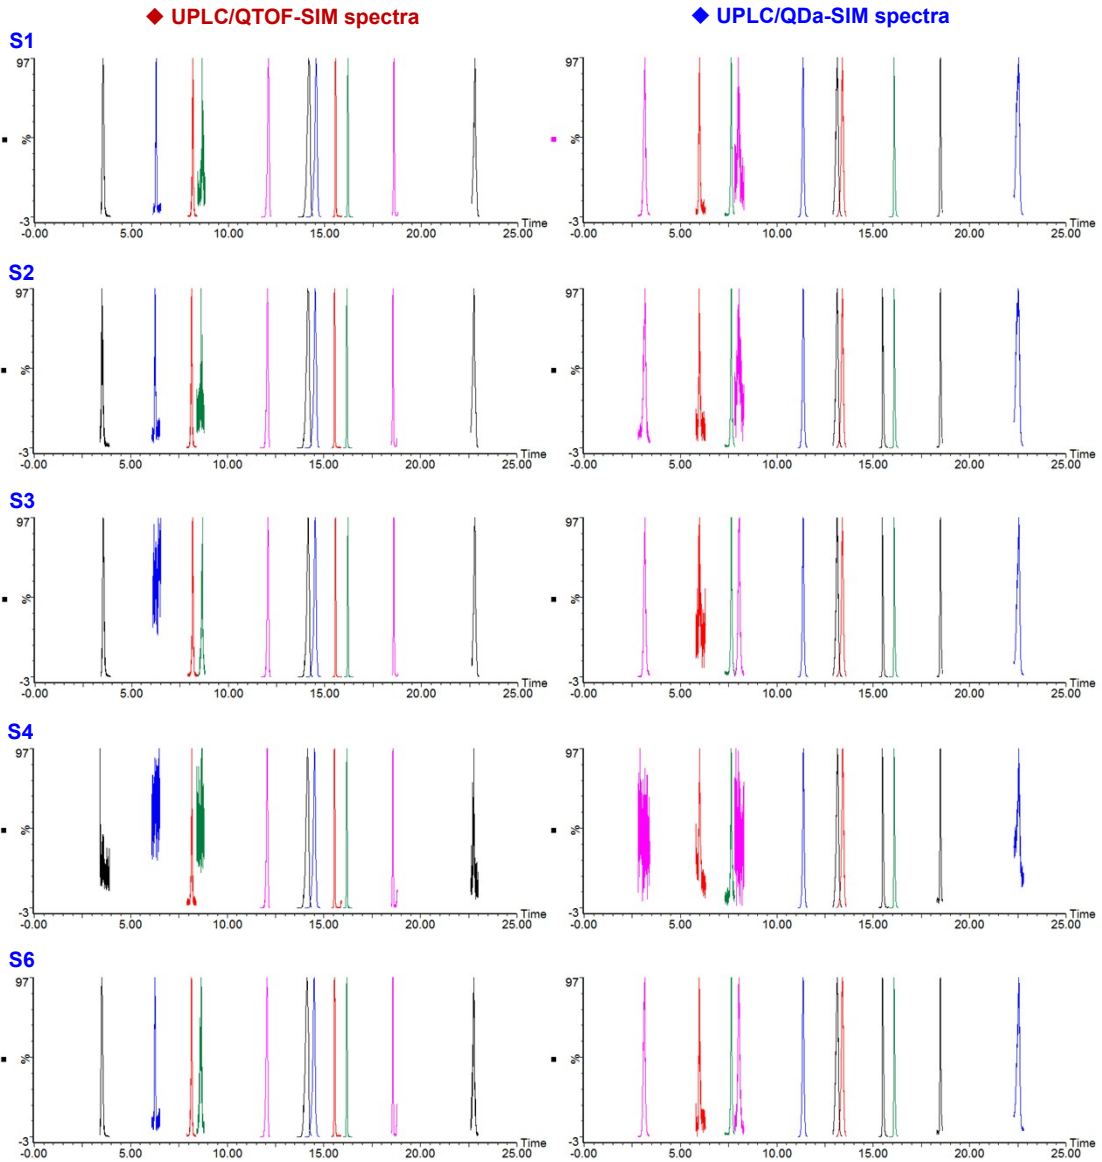

(Continued)

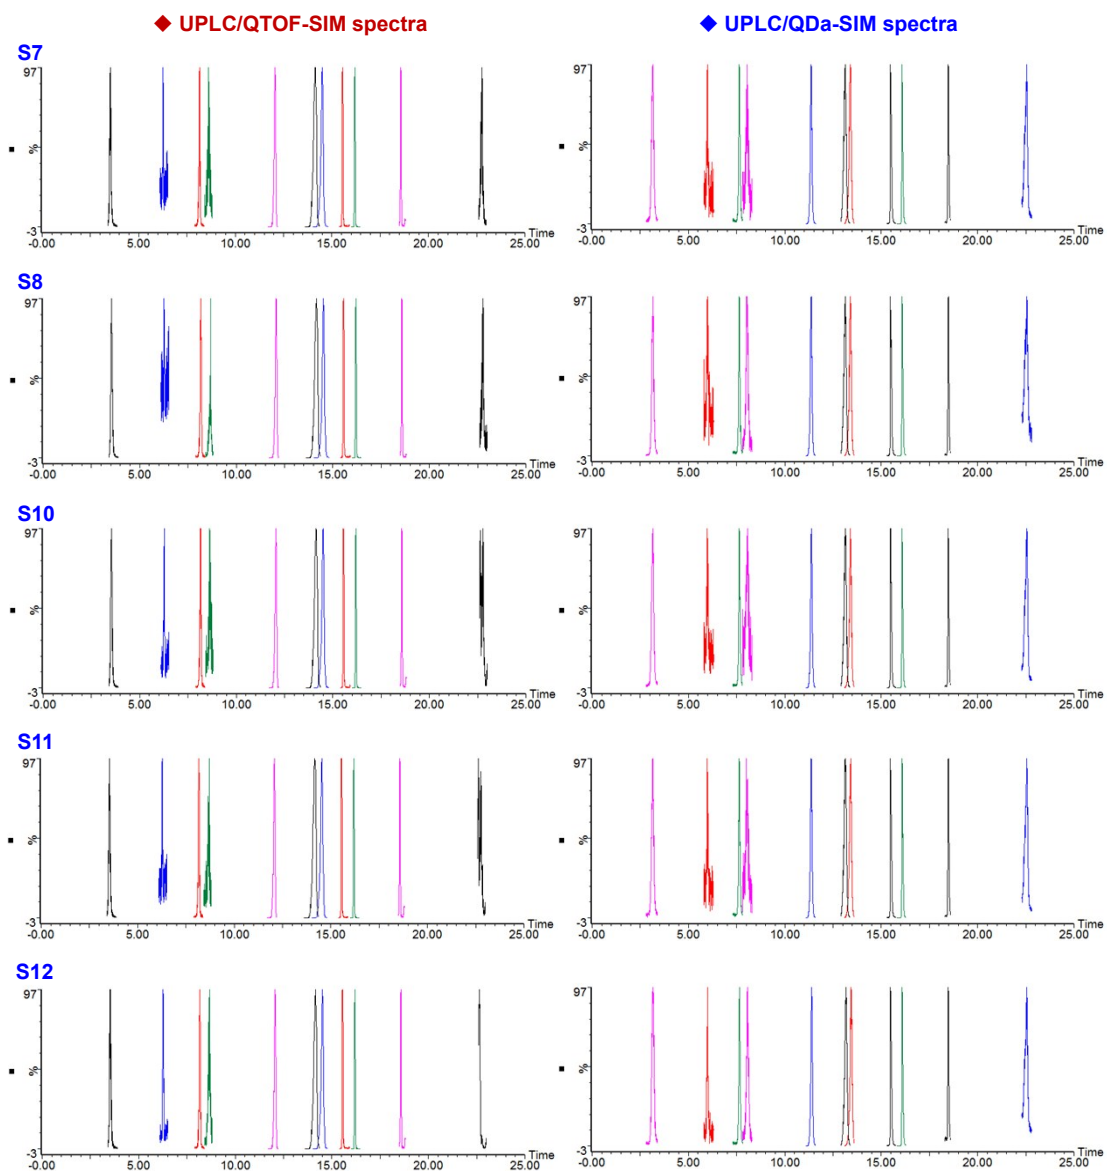

**Fig. S21** The SIM spectra of ten batches of commercial SXT samples (S1–S4, S6–S8, and S10–S12) determined on both UPLC-QTOF and UPLC-QDa.

**Table S1** Detailed information of the 250 compounds characterized from SXT by UHPLC/QTOF-Fast DDA.

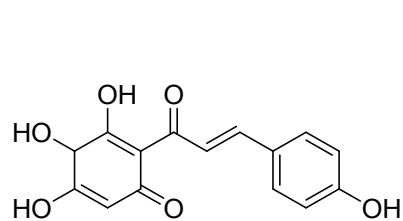

X

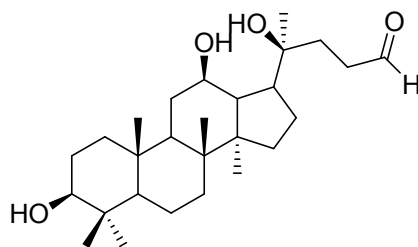

E-1

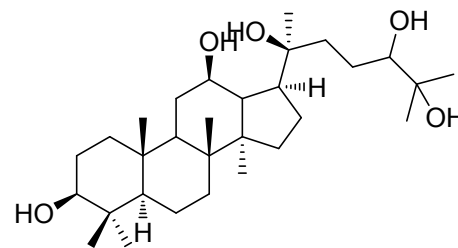

F-1

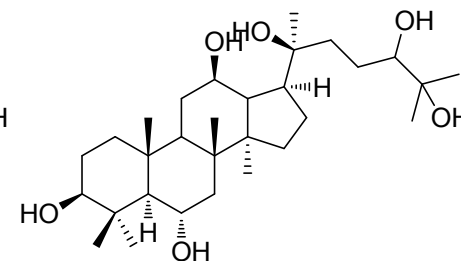

G-1

| No. | t <sub>R</sub> (min) | m/z      | Precursor ions     | Mass error (ppm) | Formula                                                       | MS/MS ions      | Identification                                                     | Subclass       | Source   |
|-----|----------------------|----------|--------------------|------------------|---------------------------------------------------------------|-----------------|--------------------------------------------------------------------|----------------|----------|
| 1   | 0.73                 | 341.1089 | [M-H] <sup>-</sup> | 1.5              | C <sub>12</sub> H <sub>22</sub> O <sub>11</sub>               | 113-101-71      | lactose or isomer                                                  | others         | LC/CT/PN |
| 2   | 1.05                 | 268.1053 | [M+H] <sup>+</sup> | 2.6              | C <sub>10</sub> H <sub>13</sub> N <sub>5</sub> O <sub>4</sub> | 136- 119        | adenosine                                                          | others         | LC/CT/PN |
| 3   | 1.19                 | 282.0846 | [M-H] <sup>-</sup> | 2.8              | C <sub>10</sub> H <sub>13</sub> N <sub>5</sub> O <sub>5</sub> | 150-133-108     | guanosine                                                          | others         | LC/CT/PN |
| 4   | 1.82                 | 326.1249 | [M-H] <sup>-</sup> | 2.8              | C <sub>15</sub> H <sub>21</sub> N <sub>7</sub> O <sub>7</sub> | 164-147         | N-D-fructose-1-yl-L-phenylalanine or isomer                        | others         | LC/CT    |
| 5   | 2.38                 | 611.1593 | [M-H] <sup>-</sup> | -3.1             | C <sub>27</sub> H <sub>32</sub> O <sub>16</sub>               | 593-491-473     | hydroxysafflor yellow B/C or safflomin A or isomer                 | QCGs           | CT       |
| 6   | 2.47                 | 315.0732 | [M-H] <sup>-</sup> | 5.1              | C <sub>13</sub> H <sub>16</sub> O <sub>9</sub>                | 152-108         | protocatechuic acid 4-glucoside or isomer                          | others         | LC       |
| 7   | 2.57                 | 515.1398 | [M-H] <sup>-</sup> | -0.6             | C <sub>22</sub> H <sub>28</sub> O <sub>14</sub>               | 191-179-135     | caffeoylquinic acid glycoside                                      | phenolic acids | LC       |
| 8   | 2.67                 | 611.1622 | [M-H] <sup>-</sup> | 1.6              | C <sub>27</sub> H <sub>32</sub> O <sub>16</sub>               | 491-328-283-119 | hydroxysafflor yellow B/C or safflomin A or isomer                 | QCGs           | CT       |
| 9   | 2.73                 | 353.0877 | [M-H] <sup>-</sup> | 1.1              | C <sub>16</sub> H <sub>18</sub> O <sub>9</sub>                | 191-135-85      | 1-O-caffeoylquinic acid                                            | phenolic acids | LC       |
| 10  | 2.88                 | 627.1542 | [M-H] <sup>-</sup> | -3               | C <sub>27</sub> H <sub>32</sub> O <sub>17</sub>               | 627-463-343-153 | methylsafflomin C/methylisafflomin C or isomer                     | QCGs           | CT       |
| 11  | 2.91                 | 529.1523 | [M-H] <sup>-</sup> | -6.4             | C <sub>23</sub> H <sub>30</sub> O <sub>14</sub>               | 193-178-149-134 | 5-O-(4'-[β-D-glucopyranosyl]-trans-feruloyl) quinic acid or isomer | phenolic acids | LC       |

|                 |      |          |                    |      |           |                           |                                                                                                                                            |                |       |
|-----------------|------|----------|--------------------|------|-----------|---------------------------|--------------------------------------------------------------------------------------------------------------------------------------------|----------------|-------|
| 12              | 2.98 | 515.1388 | [M-H] <sup>-</sup> | -2.5 | C22H28O14 | 191-179-135               | caffeoylquinic acid glycoside                                                                                                              | phenolic acids | LC    |
| 13              | 3.04 | 197.0092 | [M-H] <sup>-</sup> | 3    | C8H6O6    | 109-                      | terephthalic acid or isomer                                                                                                                | phenolic acids | LC    |
| 14 <sup>a</sup> | 3.11 | 353.0873 | [M-H] <sup>-</sup> | 0    | C16H18O9  | 191-135-85                | 5- <i>O</i> -caffeoylquinic acid (neochlorogenic acid)                                                                                     | phenolic acids | LC/CT |
| 15 <sup>a</sup> | 3.23 | 325.0938 | [M-H] <sup>-</sup> | 4.6  | C15H18O8  | 163-119-93                | trans- <i>p</i> -coumaric acid-4- <i>O</i> - $\beta$ -D-glucopyranoside                                                                    | phenolic acids | CT    |
| 16              | 3.26 | 803.1865 | [M-H] <sup>-</sup> | -2.1 | C33H40O23 | 641-478-317-286-258-202   | 6-Hydroxyquercetin-3,6,7-tri- <i>O</i> - $\beta$ -D-glucoside (6-Hydroxyquercetin -Glc-Glc-Glc)                                            | FOGs           | CT    |
| 17              | 3.26 | 817.1658 | [M-H] <sup>-</sup> | -2.1 | C33H38O24 | 641-478-315-287-271       | 6-Hydroxyquercetin-3,6-di- <i>O</i> - $\beta$ -glucoside-7- <i>O</i> - $\beta$ -glucuronide (6-Hydroxyquercetin -Glc-Glc-GluA)             | FOGs           | CT    |
| 18              | 3.26 | 515.1394 | [M-H] <sup>-</sup> | -1.4 | C22H28O14 | 179-173-135-93            | caffeoylquinic acid glycoside                                                                                                              | phenolic acids | CT    |
| 19              | 3.26 | 611.1605 | [M-H] <sup>-</sup> | -1.1 | C27H32O16 | 299-287-183-153-119       | hydroxysafflor yellow B/C or isomer                                                                                                        | QCGs           | CT    |
| 20              | 3.32 | 529.1558 | [M-H] <sup>-</sup> | 0.2  | C23H30O14 | 193-191-173-134-93        | 5- <i>O</i> -(4'-[ $\beta$ -D-glucopyranosyl]-trans-feruloyl) quinic acid or isomer                                                        | phenolic acids | LC    |
| 21              | 3.39 | 801.1688 | [M-H] <sup>-</sup> | -4.7 | C33H38O23 | 625-463-301-271           | 6-hydroxykaempferol-3,6-di- <i>O</i> - $\beta$ -glucoside-7- <i>O</i> - $\beta$ -glucuronide or isomer (6-hydroxykaempferol -Glc-Glc-GluA) | FOGs           | CT    |
| 22              | 3.52 | 515.1392 | [M-H] <sup>-</sup> | -1.7 | C22H28O14 | 323-191-161-135-133-93-85 | caffeoylquinic acid glycoside                                                                                                              | phenolic acids | LC    |
| 23              | 3.52 | 611.1588 | [M-H] <sup>-</sup> | -3.9 | C27H32O16 | 521-300-191-119           | hydroxysafflor yellow B/C or safflomin A or isomer                                                                                         | QCGs           | CT    |
| 24              | 3.62 | 529.1566 | [M-H] <sup>-</sup> | -0.2 | C23H30O14 | 173-93                    | 5- <i>O</i> -(4'-[ $\beta$ -D-glucopyranosyl]-trans-feruloyl) quinic acid or isomer                                                        | phenolic acids | LC    |
| 25 <sup>a</sup> | 3.66 | 787.1920 | [M-H] <sup>-</sup> | -1.7 | C33H40O22 | 625-463-301-299-271       | 6-Hydroxykaempferol-3,6,7-tri- <i>O</i> - $\beta$ -D-glucoside                                                                             | FOGs           | CT    |
| 26              | 3.68 | 625.1397 | [M-H] <sup>-</sup> | -1.3 | C27H30O17 | 625-463-301-271           | quercetin (or 6-hydroxykaempferol)-Glc-Glc                                                                                                 | FOGs           | CT    |
| 27              | 3.68 | 801.1718 | [M-H] <sup>-</sup> | -1.0 | C33H38O23 | 625-463-301-299-271       | 6-hydroxykaempferol-3,6-di- <i>O</i> - $\beta$ -glucoside-7- <i>O</i> - $\beta$ -glucuronide or isomer (6-hydroxykaempferol-Glc-Glc-GluA)  | FOGs           | CT    |
| 28              | 3.71 | 627.1562 | [M-H] <sup>-</sup> | 0.2  | C27H32O17 | 623-507-419-299-205-135   | methylsafflomin C/methylisafflomin C or isomer                                                                                             | QCGs           | CT    |
| 29              | 3.78 | 515.1401 | [M-H] <sup>-</sup> | 0.0  | C22H28O14 | 341-191-179-173-135-93    | caffeoylquinic acid glycoside                                                                                                              | phenolic acids | LC    |

|                 |      |          |                       |      |           |                                 |                                                                       |                |       |
|-----------------|------|----------|-----------------------|------|-----------|---------------------------------|-----------------------------------------------------------------------|----------------|-------|
| 30              | 3.78 | 593.1506 | [M-H] <sup>-</sup>    | 0.0  | C27H30O15 | 575-483-119                     | saffloquinoside C or safflow yellow A                                 | QCGs           | CT    |
| 31 <sup>a</sup> | 3.90 | 417.1404 | [M+HCOO] <sup>-</sup> | 1.7  | C17H24O9  | 191-135-119                     | syringin                                                              | phenolic acids | CT    |
| 32 <sup>a</sup> | 3.91 | 325.0911 | [M-H] <sup>-</sup>    | -3.7 | C15H18O8  | no                              | cis- <i>p</i> -coumaric acid-4- <i>O</i> - $\beta$ -D-glucopyranoside | phenolic acids | CT    |
| 33 <sup>a</sup> | 3.92 | 353.0874 | [M-H] <sup>-</sup>    | 0.3  | C16H18O9  | 191-85                          | 3- <i>O</i> -caffeoylquinic acid (chlorogenic acid)                   | phenolic acids | LC/CT |
| 34              | 4.00 | 639.1201 | [M-H] <sup>-</sup>    | 0.6  | C27H28O18 | 463-300-271-255-243             | quercetin (or 6-hydroxykaempferol)-Glc-GluA                           | FOGs           | CT    |
| 35              | 4.00 | 785.1776 | [M-H] <sup>-</sup>    | 0.0  | C33H38O22 | 609-463-447-301-271-255-243     | quercetin (or 6-hydroxykaempferol)-Rha-Glc-GluA                       | FOGs           | CT    |
| 36              | 4.06 | 625.1420 | [M-H] <sup>-</sup>    | 2.4  | C27H30O17 | 462-299-271-151                 | quercetin (or 6-hydroxykaempferol)-Glc-Glc                            | FOGs           | LC/CT |
| 37              | 4.06 | 353.0889 | [M-H] <sup>-</sup>    | 4.5  | C16H18O9  | 191-173-135-93                  | 4- <i>O</i> -caffeoylquinic acid                                      | phenolic acids | CT    |
| 38              | 4.12 | 367.1031 | [M-H] <sup>-</sup>    | 0.5  | C17H20O9  | 119-                            | 3-feruloylquinic acid or isomer                                       | phenolic acids | LC    |
| 39 <sup>a</sup> | 4.17 | 611.1609 | [M-H] <sup>-</sup>    | -0.5 | C27H32O16 | 491-471-325-283-205-163-119     | hydroxysafflor yellow A                                               | QCGs           | CT    |
| 40              | 4.17 | 625.1407 | [M-H] <sup>-</sup>    | 0.3  | C27H30O17 | 463-301-271-255-243-178         | quercetin (or 6-hydroxykaempferol)-Glc-Glc                            | FOGs           | CT    |
| 41              | 4.20 | 627.1551 | [M-H] <sup>-</sup>    | -1.6 | C27H32O17 | 627-419-299-207-178-119         | methylsafflomin C/methylisafflomin C or isomer                        | QCGs           | CT    |
| 42              | 4.23 | 639.1192 | [M-H] <sup>-</sup>    | -0.8 | C27H28O18 | 463-301-271-255-243-165-139     | quercetin (or 6-hydroxykaempferol)-Glc-GluA                           | FOGs           | CT    |
| 43              | 4.25 | 595.1657 | [M-H] <sup>-</sup>    | -1.0 | C27H32O15 | 385-355-313-119                 | dihydrosaffloquinoside A or isomer                                    | QCGs           | CT    |
| 44              | 4.29 | 179.0354 | [M-H] <sup>-</sup>    | 5.6  | C9H8O4    | 135-                            | caffeic acid                                                          | phenolic acids | LC/CT |
| 45              | 4.38 | 593.1505 | [M-H] <sup>-</sup>    | -0.2 | C27H30O15 | 447-299-119                     | saffloquinoside C or safflow yellow A                                 | QCGs           | CT    |
| 46              | 4.44 | 611.1606 | [M-H] <sup>-</sup>    | -1.0 | C27H32O16 | 521-491-328-119                 | hydroxysafflor yellow B/C or safflomin A or isomer                    | QCGs           | CT    |
| 47              | 4.44 | 879.4934 | [M+HCOO] <sup>-</sup> | -2.2 | C42H74O16 | 671-653-510-496                 | notoginsenoside J or isomer ((G-1)-Glc-Glc)                           | saponins       | PN    |
| 48              | 4.47 | 447.0922 | [M-H] <sup>-</sup>    | -1.1 | C21H20O11 | 284-255-227                     | kaempferol-Glc                                                        | FOGs           | CT    |
| 49              | 4.47 | 623.1249 | [M-H] <sup>-</sup>    | 0.2  | C27H28O17 | 447-284-255-227                 | kaempferol-Glc-GluA                                                   | FOGs           | CT    |
| 50              | 4.57 | 641.1358 | [M-H] <sup>-</sup>    | 0.6  | C27H30O18 | 641-479-317-287                 | 6-hydroxyquercetin-Glc-Glc                                            | FOGs           | CT    |
| 51              | 4.60 | 879.4927 | [M+HCOO] <sup>-</sup> | -3.0 | C42H74O16 | 671-653-509-367                 | notoginsenoside J or isomer ((G-1)-Glc-Glc)                           | saponins       | PN    |
| 52              | 4.76 | 337.0935 | [M-H] <sup>-</sup>    | 3.6  | C16H17O8  | 247-191                         | <i>p</i> -coumaroylquinic acid or isomer                              | phenolic acids | CT    |
| 53              | 4.76 | 449.1089 | [M-H] <sup>-</sup>    | 1.1  | C21H22O11 | 329-287-259-195-181-167-128-119 | X+Glc                                                                 | QCGs           | CT    |

|                 |      |          |                        |      |           |                             |                                                                                                                  |                |       |
|-----------------|------|----------|------------------------|------|-----------|-----------------------------|------------------------------------------------------------------------------------------------------------------|----------------|-------|
| 54              | 4.86 | 449.1080 | [M-H] <sup>-</sup>     | -0.9 | C21H22O11 | 329-301-287-223-195-167-119 | X+Glc                                                                                                            | QCGs           | CT    |
| 55              | 4.92 | 611.1606 | [M-H] <sup>-</sup>     | -1.0 | C27H32O16 | 449-287-166-119-109         | 4',5,6,7-tetrahydroxy-flavanone -di-glucoside                                                                    | FOGs           | LC    |
| 56              | 4.92 | 515.1188 | [M-H] <sup>-</sup>     | -0.4 | C25H24O12 | 191-179-161-135             | di-O-caffeoylquinic acid                                                                                         | phenolic acids | CT    |
| 57              | 4.99 | 449.1079 | [M-H] <sup>-</sup>     | -1.1 | C21H22O11 | 329-301-287-195-167-119     | X+Glc                                                                                                            | QCGs           | CT    |
| 58 <sup>a</sup> | 5.03 | 771.1981 | [M-H] <sup>-</sup>     | -0.4 | C33H40O21 | 771-609-462-301-271-243-165 | 6-hydroxykaempferol-3- <i>O</i> - $\beta$ -rutinoside-6- <i>O</i> - $\beta$ -D-glucoside                         | FOGs           | CT    |
| 59 <sup>a</sup> | 5.11 | 625.1420 | [M-H] <sup>-</sup>     | 2.4  | C27H30O17 | 625-463-301-271-255-243     | 6-hydroxykaempferol 3,6- <i>O</i> - $\beta$ -diglucoside                                                         | FOGs           | CT    |
| 60              | 5.18 | 367.1017 | [M-H] <sup>-</sup>     | -3.3 | C17H20O9  | 191-134-93                  | 3-feruloylquinic acid or isomer                                                                                  | phenolic acids | LC    |
| 61              | 5.22 | 611.1616 | [M-H] <sup>-</sup>     | 0.7  | C27H32O16 | 611-521-287-119             | hydroxysafflor yellow B/C or isomer                                                                              | QCGs           | CT    |
| 62              | 5.27 | 627.1567 | [M-H] <sup>-</sup>     | 1.0  | C27H32O17 | 627-419-299-178-119         | methylsafflomin C/methylisosafflomin C or isomer                                                                 | QCGs           | CT    |
| 63 <sup>a</sup> | 5.34 | 623.1243 | [M-H] <sup>-</sup>     | -0.8 | C27H28O17 | 623-447-285                 | 6-hydroxyapigenin-6- <i>O</i> - $\beta$ -D-glucoside-7- <i>O</i> - $\beta$ -D-glucuronide                        | FOGs           | CT    |
| 64              | 5.35 | 447.0932 | [M-H] <sup>-</sup>     | 1.1  | C21H20O11 | no                          | kaempferol-Glc                                                                                                   | FOGs           | CT    |
| 65              | 5.38 | 593.1497 | [M-H] <sup>-</sup>     | -1.5 | C27H30O15 | 119-                        | saffloquinoside C or isomer                                                                                      | QCGs           | CT    |
| 66              | 5.43 | 163.0404 | [M-H] <sup>-</sup>     | 5.5  | C9H8O3    | 119-93                      | ( <i>Z</i> )-3-(4-hydroxyphenyl) acrylic acid                                                                    | phenolic acids | LC/CT |
| 67              | 5.48 | 861.4824 | [M+HCOO] <sup>-</sup>  | -2.8 | C42H72O15 | 653-491-403                 | notoginsenoside M/vinaginsenoside R15 (491-Glc-Glc)                                                              | saponins       | PN    |
| 68              | 5.51 | 595.1294 | [M-H] <sup>-</sup>     | -0.8 | C26H28O16 | 300-271-255-243             | quercetin (or 6-hydroxykaempferol)-Xyl-Glc                                                                       | FOGs           | CT    |
| 69              | 5.57 | 609.1448 | [M-H] <sup>-</sup>     | -1.3 | C27H30O16 | 301-271-243-165-110         | quercetin (or 6-hydroxykaempferol)-rutinoside                                                                    | FOGs           | CT    |
| 70              | 5.57 | 861.4836 | [M+HCOO] <sup>-</sup>  | -1.4 | C42H72O15 | 653-553-491-403             | notoginsenoside M/vinaginsenoside R15 (491-Glc-Glc)                                                              | saponins       | PN    |
| 71 <sup>a</sup> | 5.62 | 425.1464 | [M+HCOO] <sup>-</sup>  | 3.8  | C19H24O8  | 157-143-129                 | ( <i>2E,8E,10E</i> )-12 <i>R</i> -tridecatriene-4,6-diyne-1,12,13-triol-1- <i>O</i> - $\beta$ -D-glucopyranoside | others         | CT    |
| 72              | 5.63 | 207.1024 | [M+H-H2O] <sup>+</sup> | 1.4  | C12H16O4  | 207-189-165-153-123-91-79   | chuanxiongnode R2 or isomer                                                                                      | phthalides     | LC    |
| 73              | 5.64 | 611.1610 | [M-H] <sup>-</sup>     | -0.3 | C27H32O16 | 449-287-164-153-136-119     | 4',5,6,7-tetrahydroxy-flavanone -di- <i>O</i> - $\beta$ -glucoside                                               | FOGs           | CT    |
| 74              | 5.67 | 611.1602 | [M-H] <sup>-</sup>     | -1.6 | C27H32O16 | 611-449-287-285-256-119     | hydroxysafflor yellow B/C or isomer                                                                              | QCGs           | CT    |
| 75 <sup>a</sup> | 5.69 | 609.1462 | [M-H] <sup>-</sup>     | 1.0  | C27H30O16 | 429-284-255-227             | kaempferol-3- <i>O</i> - $\beta$ -D-glucosyl (1 $\rightarrow$ 2)- $\beta$ -D-glucoside                           | FOGs           | CT    |

|                 |      |           |                                     |      |           |                          |                                                                                   |                |    |
|-----------------|------|-----------|-------------------------------------|------|-----------|--------------------------|-----------------------------------------------------------------------------------|----------------|----|
| 76              | 5.70 | 881.2153  | [M-H] <sup>-</sup>                  | 1.5  | C42H42O21 | 761-593-449-287          | 2(X+Glc)-H <sub>2</sub> O                                                         | QCGs           | CT |
| 77 <sup>a</sup> | 5.71 | 463.0889  | [M-H] <sup>-</sup>                  | 2.6  | C21H20O12 | 301-271-243              | 6-hydroxykaempferol-3- <i>O</i> -β-D-glucopyranoside                              | FOGs           | CT |
| 78              | 5.80 | 611.1614  | [M-H] <sup>-</sup>                  | 0.3  | C27H32O16 | 521-287-119              | hydroxysafflor yellow B/C or isomer                                               | QCGs           | CT |
| 79              | 5.86 | 1043.2675 | [M-H] <sup>-</sup>                  | 0.6  | C48H52O26 | 923-449-287-119          | anhydrosafflor yellow B isomer                                                    | QCGs           | CT |
| 80 <sup>a</sup> | 5.97 | 193.0517  | [M-H] <sup>-</sup>                  | 8.3  | C10H10O4  | 178-134-133-106          | ferulic acid                                                                      | phenolic acids | LC |
| 81 <sup>a</sup> | 5.99 | 609.1469  | [M-H] <sup>-</sup>                  | 2.1  | C27H30O16 | 301-271-255-243-227      | rutin                                                                             | FOGs           | CT |
| 82              | 5.99 | 449.1093  | [M-H] <sup>-</sup>                  | 2.0  | C21H22O11 | 287-166-153-119          | (2 <i>S</i> )-4',5,6,7-tetrahydroxy-flavanone -D-glucoside                        | FOGs           | CT |
| 83 <sup>a</sup> | 6.12 | 463.0872  | [M-H] <sup>-</sup>                  | -1.1 | C21H20O12 | 301-287-271-151          | quercetin-7- <i>O</i> -β-D-glucoside                                              | FOGs           | CT |
| 84              | 6.25 | 463.0878  | [M-H] <sup>-</sup>                  | 0.2  | C21H20O12 | 300-271-255-243          | quercetin-3- <i>O</i> -β-D-glucoside                                              | FOGs           | CT |
| 85 <sup>a</sup> | 6.28 | 447.0926  | [M-H] <sup>-</sup>                  | -0.2 | C21H20O11 | 285-151-133-107          | luteolin-7- <i>O</i> - <i>O</i> -β-glucopyranoside                                | FOGs           | CT |
| 86              | 6.31 | 593.1498  | [M-H] <sup>-</sup>                  | -1.3 | C27H30O15 | 310-177-119              | saffloquinoside C or safflow yellow A                                             | QCGs           | CT |
| 87              | 6.37 | 461.0711  | [M-H] <sup>-</sup>                  | -2.0 | C21H18O12 | 285-271-255              | Kaempferol-GluA                                                                   | FOGs           | CT |
| 88 <sup>a</sup> | 6.43 | 449.1077  | [M-H] <sup>-</sup>                  | -1.6 | C21H22O11 | 287-166-153-139-110      | (2 <i>S</i> )-4',5,6,7-tetrahydroxy-flavanone 6- <i>O</i> - <i>O</i> -β-glucoside | FOGs           | CT |
| 89              | 6.56 | 209.1178  | [M+H-H <sub>2</sub> O] <sup>+</sup> | 3.3  | C12H18O4  | 163-153-107-93-79-77     | senkyunolide J/N                                                                  | phthalides     | LC |
| 90 <sup>a</sup> | 6.6  | 593.1497  | [M-H] <sup>-</sup>                  | -1.5 | C27H30O15 | 285-255-227              | kaempferol 3- <i>O</i> -β-rutinoside                                              | FOGs           | CT |
| 91 <sup>a</sup> | 6.67 | 1043.2654 | [M-H] <sup>-</sup>                  | -1.4 | C48H52O26 | 923-862-593-449-287-119  | anhydrosafflor yellow B                                                           | QCGs           | CT |
| 92              | 6.7  | 515.1184  | [M-H] <sup>-</sup>                  | -1.2 | C25H24O12 | 191-179-161-135          | di- <i>O</i> -caffeoylquinic acid                                                 | phenolic acids | LC |
| 93 <sup>a</sup> | 6.73 | 623.1619  | [M-H] <sup>-</sup>                  | 1.1  | C28H32O16 | 315-300-299-271-243-215  | 5,7,4'-trihydroxy-6-methoxyflavone-3- <i>O</i> -β-D-rutinoside                    | FOGs           | LC |
| 94              | 6.73 | 209.1182  | [M+H-H <sub>2</sub> O] <sup>+</sup> | 1.9  | C12H18O4  | 153-79                   | senkyunolide J/N                                                                  | phthalides     | CT |
| 95 <sup>a</sup> | 6.76 | 593.1509  | [M-H] <sup>-</sup>                  | 0.5  | C27H30O15 | 430-297-119              | saffloquinoside A                                                                 | QCGs           | CT |
| 96              | 6.77 | 449.1084  | [M-H] <sup>-</sup>                  | 0    | C21H22O11 | 119-                     | X+Glc                                                                             | QCGs           | CT |
| 97              | 6.80 | 1139.5850 | [M+HCOO] <sup>-</sup>               | 0.1  | C53H90O23 | 1093-961-799-637-475-221 | gypenoside LXXI or isomer (PPT-(Glc-Glc)-Glc-Xyl)                                 | saponins       | PN |
| 98              | 6.83 | 515.1183  | [M-H] <sup>-</sup>                  | -1.4 | C25H24O12 | 191-179-161-135-85       | di- <i>O</i> -caffeoylquinic acid                                                 | phenolic acids | LC |

|                  |      |           |                        |      |            |                                  |                                                            |                |    |
|------------------|------|-----------|------------------------|------|------------|----------------------------------|------------------------------------------------------------|----------------|----|
| 99 <sup>a</sup>  | 6.86 | 447.0931  | [M-H] <sup>-</sup>     | 0.9  | C21H20O11  | 284-255-227                      | kaempferol-3- <i>O</i> - $\beta$ -D-glucoside              | FOGs           | CT |
| 100 <sup>a</sup> | 6.92 | 515.1185  | [M-H] <sup>-</sup>     | -1.0 | C25H24O12  | 191-179-135                      | 3,5-di- <i>O</i> -caffeoylquinic acid                      | phenolic acids | LC |
| 101              | 6.93 | 463.0873  | [M-H] <sup>-</sup>     | -0.9 | C21H20O12  | 301-271-243                      | quercetin (or 6-hydroxykaempferol)-Glc                     | FOGs           | CT |
| 102              | 6.96 | 1139.5854 | [M+HCOO] <sup>-</sup>  | 0.4  | C53H90O23  | 1094-961-637-475-221             | gypenoside LXXI or isomer (PPT-(Glc-Glc)-Glc-Xyl)          | saponins       | PN |
| 103              | 7.08 | 207.1030  | [M+H-H2O] <sup>+</sup> | 4.3  | C12H16O4   | 207-189-153-117-105-91-79        | chuanxiongolide R2 or isomer                               | phthalides     | LC |
| 104 <sup>a</sup> | 7.09 | 1007.5422 | [M+HCOO] <sup>-</sup>  | -0.5 | C48H82O19  | 961-799-637-475-323-263-221      | noto-R3                                                    | saponins       | PN |
| 105              | 7.09 | 574.1562  | [M-H] <sup>-</sup>     | 0.2  | C27H29NO13 | 364-338-244-232-119              | cartormin or isomer                                        | QCGs           |    |
| 106              | 7.15 | 1153.5995 | [M+HCOO] <sup>-</sup>  | -1.0 | C54H92O23  | 1107-961-945-799-783-637-475-221 | quinquenoside Ja or isomer (PPT-(Glc-Glc)-Rha-Glc)         | saponins       | PN |
| 107 <sup>a</sup> | 7.21 | 1007.5428 | [M+HCOO] <sup>-</sup>  | 0.1  | C48H82O19  | 961-799-781-637-619-475-391-221  | ginsenoside Re3                                            | saponins       | PN |
| 108              | 7.22 | 1153.5985 | [M+HCOO] <sup>-</sup>  | -1.8 | C54H92O23  | 1107-961-946-800-637-475-221     | quinquenoside Ja or isomer (PPT-(Glc-Glc)-Rha-Glc)         | saponins       | PN |
| 109 <sup>a</sup> | 7.28 | 1007.5426 | [M+HCOO] <sup>-</sup>  | -0.1 | C48H82O19  | 961-799-637-475-391-323-221      | noto-M                                                     | saponins       | CT |
| 110              | 7.28 | 449.1088  | [M-H] <sup>-</sup>     | 0.9  | C21H22O11  | 287-181-165-153-139-119-110      | (2 <i>S</i> )-4',5,6,7-tetrahydroxy-flavanone -D-glucoside | FOGs           | CT |
| 111              | 7.28 | 574.1561  | [M-H] <sup>-</sup>     | 0.0  | C27H29NO13 | 364-338-244-232-119              | cartormin or isomer                                        | QCGs           | PN |
| 112              | 7.31 | 515.1199  | [M-H] <sup>-</sup>     | 1.7  | C25H24O12  | 191-179-173-161-135-93           | di- <i>O</i> -caffeoylquinic acid                          | phenolic acids | LC |
| 113              | 7.46 | 881.2106  | [M-H] <sup>-</sup>     | -3.9 | C42H42O21  | 449-287-153-119                  | 2(X+Glc)-H <sub>2</sub> O                                  | QCGs           | CT |
| 114 <sup>a</sup> | 7.49 | 207.1031  | [M+H-H2O] <sup>+</sup> | 4.8  | C12H16O4   | 207-189-161-133-119-105-91-79    | senkyunolide I                                             | phthalides     | LC |
| 115 <sup>a</sup> | 7.50 | 1007.5409 | [M+HCOO] <sup>-</sup>  | -1.8 | C48H82O19  | 961-799-637-475-391-221          | 20- <i>O</i> -glu-Rf                                       | saponins       | PN |
| 116              | 7.50 | 1139.5862 | [M+HCOO] <sup>-</sup>  | 1.1  | C53H90O23  | 1093-932-637-475-245             | gypenoside LXXI or isomer (PPT-Glc-(Glc-Xyl)-Glc)          | saponins       | PN |
| 117              | 7.63 | 1007.5431 | [M+HCOO] <sup>-</sup>  | 0.4  | C48H82O19  | 961-799-637-475-245-221          | notoginsenoside N/R6 or isomer (PPT-(Glc-Glc)-Glc)         | saponins       | PN |
| 118 <sup>a</sup> | 7.68 | 977.5336  | [M+HCOO] <sup>-</sup>  | 1.5  | C47H80O18  | 931-799-769-637-619-475-391-191  | noto-R1                                                    | saponins       | PN |
| 119 <sup>a</sup> | 7.76 | 613.1555  | [M-H] <sup>-</sup>     | -0.3 | C30H30O14  | 407-361-287-241-119              | isosafflomin C                                             | QCGs           | CT |
| 120              | 7.76 | 1007.5403 | [M+HCOO] <sup>-</sup>  | -2.4 | C48H82O19  | 961-799-781-637-475              | notoginsenoside N/R6 or isomer (PPT-Glc-Glc-Glc)           | saponins       | PN |



|                  |      |           |                        |      |           |                                     |                                                     |                |    |
|------------------|------|-----------|------------------------|------|-----------|-------------------------------------|-----------------------------------------------------|----------------|----|
| 121              | 7.85 | 1167.5790 | [M+HCOO] <sup>-</sup>  | -0.8 | C54H90O24 | 1121-959-797-637-473-263-221        | notoginsenoside B or isomer (473-(Glc-Glc)-Glc-Glc) | saponins       | PN |
| 122 <sup>a</sup> | 7.88 | 977.5320  | [M+HCOO] <sup>-</sup>  | -0.1 | C47H80O18 | 931-799-637-620-475-391-191         | 20-(S)-Sanchi-A5                                    | saponins       | PN |
| 123              | 7.89 | 1007.5423 | [M+HCOO] <sup>-</sup>  | -0.4 | C48H82O19 | 961-799-637-475-323                 | notoginsenoside N/R6 or isomer (PPT-Glc-Glc-Glc)    | saponins       | PN |
| 124 <sup>a</sup> | 7.90 | 207.1032  | [M+H-H2O] <sup>+</sup> | 5.3  | C12H16O4  | 207-189-161-133-119-105-91-79       | senkyunolide H                                      | phthalides     | LC |
| 125 <sup>a</sup> | 7.95 | 613.1564  | [M-H] <sup>-</sup>     | 1.1  | C30H30O14 | 407-361-287-241-119                 | safflomin C                                         | QCGs           | CT |
| 126 <sup>a</sup> | 8.07 | 845.4901  | [M+HCOO] <sup>-</sup>  | 0.2  | C42H72O14 | 799-637-553-475-391                 | ginsenoside Rg1                                     | saponins       | PN |
| 127 <sup>a</sup> | 8.07 | 991.5463  | [M+HCOO] <sup>-</sup>  | -1.5 | C48H82O18 | 945-800-783-765-637-619-475-391-205 | ginsenoside Re                                      | saponins       | PN |
| 128              | 8.18 | 237.0781  | [M-H] <sup>-</sup>     | 7.6  | C12H14O5  | 193-136-108                         | 3,4,5-trimethoxycinnamyllic acid or isomer          | phenolic acids | LC |
| 129              | 8.19 | 221.0821  | [M+H] <sup>+</sup>     | 3.2  | C12H12O4  | 179-165-161-129-109-105-81          | senkyunolide D                                      | phthalides     | LC |
| 130              | 8.24 | 881.2138  | [M-H] <sup>-</sup>     | -0.2 | C42H42O21 | 700-593-473-449-311-287-119         | 2(X+Glc)-H <sub>2</sub> O                           | QCGs           | CT |
| 131              | 8.47 | 1025.5465 | [M+HCOO] <sup>-</sup>  | -6.5 | C48H84O20 | 979-817-799-655-637-493-221         | (F-1)-(Glc-Glc)-Glc                                 | saponins       | PN |
| 132 <sup>b</sup> | 8.50 | 885.4827  | [M-H] <sup>-</sup>     | -2.4 | C45H74O17 | 799-781-637-619-475-391             | malonyl ginsenoside Rg1 or isomer (PPT-Glc-Glc-mal) | saponins       | PN |
| 133              | 8.57 | 947.5204  | [M+HCOO] <sup>-</sup>  | -1.3 | C46H78O17 | 901-769-739-607-475-391             | PPT-Xyl-Glc-Xyl                                     | saponins       | PN |
| 134              | 8.60 | 843.4727  | [M+HCOO] <sup>-</sup>  | -1.8 | C42H70O14 | 635-473                             | pseudo ginsenoside G1/G2 or isomer (473-Glc-Glc)    | saponins       | PN |
| 135              | 8.65 | 1169.5924 | [M+HCOO] <sup>-</sup>  | -2.7 | C54H92O24 | 1123-961-781-637-475-221            | notoginsenoside A or isomer (PPT-Glc-Glc-Glc-Glc)   | saponins       | PN |
| 136 <sup>a</sup> | 8.82 | 1005.5263 | [M+HCOO] <sup>-</sup>  | -0.7 | C48H80O19 | 959-797-635-473-221                 | noto-G                                              | saponins       | PN |
| 137 <sup>a</sup> | 8.85 | 815.4794  | [M+HCOO] <sup>-</sup>  | 0.1  | C41H70O13 | 769-609-475-391                     | 20-(S)-Sanchi-A4                                    | saponins       | PN |
| 138              | 8.85 | 885.4849  | [M-H] <sup>-</sup>     | 0.1  | C45H74O17 | 637-619-475-391                     | malonyl ginsenoside Rg1 or isomer (PPT-Glc-Glc-mal) | saponins       | PN |
| 139 <sup>a</sup> | 8.91 | 285.0400  | [M-H] <sup>-</sup>     | 0.4  | C15H10O6  | 151-133-107                         | luteolin                                            | FOGs           | LC |
| 140 <sup>a</sup> | 8.93 | 301.0360  | [M-H] <sup>-</sup>     | 4.0  | C15H10O7  | 151-121-107                         | Quercetin                                           | FOGs           | LC |
| 141              | 8.95 | 205.0867  | [M+H] <sup>+</sup>     | 1.0  | C12H12O3  | 149-145-115-105-91                  | senkyunolide B or isomer                            | phthalides     | LC |
| 142              | 9.07 | 815.4782  | [M+HCOO] <sup>-</sup>  | -1.3 | C41H70O13 | 637-619-475                         | pseudoginsenoside RT3 or isomer (PPT-Xyl-Glc)       | saponins       | PN |
| 143              | 9.07 | 1167.5752 | [M+HCOO] <sup>-</sup>  | -4.0 | C54H90O24 | 1121-959-797-637-473-263-221        | notoginsenoside B or isomer (473-(Glc-Glc)-Glc-Glc) | saponins       | PN |
| 144              | 9.13 | 205.0867  | [M+H] <sup>+</sup>     | 1.0  | C12H12O3  | 163-149-145-115-107-91-89-65        | senkyunolide B or isomer                            | phthalides     | LC |

|                  |       |           |                       |      |            |                                                       |                                                              |            |    |
|------------------|-------|-----------|-----------------------|------|------------|-------------------------------------------------------|--------------------------------------------------------------|------------|----|
| 145 <sup>a</sup> | 9.17  | 815.4785  | [M+HCOO] <sup>-</sup> | -1.0 | C41H70O13  | 637-553-475-391                                       | 20-(S)-Sanchi-A3                                             | saponins   | PN |
| 146              | 9.23  | 887.498   | [M-H] <sup>-</sup>    | -2.7 | C45H76O17  | 783-637-619-475-391                                   | mal-PPT-Glc-Rha                                              | saponins   | PN |
| 147              | 9.26  | 582.2595  | [M-H] <sup>-</sup>    | -1.5 | C34H37N3O6 | 342-316-145-119                                       | N1, N5, N10-(E)-tri- <i>p</i> -coumaroylspermidine or isomer | others     | CT |
| 148              | 9.29  | 975.515   | [M+HCOO] <sup>-</sup> | -1.5 | C47H78O18  | 929-797-635-475                                       | PPT-Glc-Glc-Xyl                                              | saponins   | PN |
| 149              | 9.36  | 1007.5383 | [M+HCOO] <sup>-</sup> | 0.2  | C48H82O19  | 961-781-621-537-221                                   | notoginsenoside N/R6 or isomer ((F-1)-Rha-(Glc-Glc))         | saponins   | PN |
| 150              | 9.48  | 582.2604  | [M-H] <sup>-</sup>    | 0.0  | C34H37N3O6 | 462-342-316-299-145-119                               | N1, N5, N10-(E)-tri- <i>p</i> -coumaroylspermidine or isomer | others     | CT |
| 151 <sup>a</sup> | 9.50  | 1007.5413 | [M+HCOO] <sup>-</sup> | -1.4 | C48H82O19  | 961-799-781-637-475-391-221                           | vinagenoside R4                                              | saponins   | PN |
| 152              | 9.50  | 843.4726  | [M+HCOO] <sup>-</sup> | -1.9 | C42H70O14  | 798-635-473                                           | pseudo ginsenoside G1/G2 or isomer (473-Glc-Glc)             | saponins   | PN |
| 153              | 9.55  | 977.5298  | [M+HCOO] <sup>-</sup> | -2.4 | C47H80O18  | 931-799-637-353-221                                   | noto-R1 isomer (PPT-(Glc-Glc)-Xyl)                           | saponins   | PN |
| 154              | 9.59  | 189.0923  | [M+H] <sup>+</sup>    | 3.7  | C12H12O2   | 171-161-145-128-115-105-91-77                         | butylidenrphthalide isomer                                   | phthalides | LC |
| 155              | 9.61  | 582.2603  | [M-H] <sup>-</sup>    | -0.2 | C34H37N3O6 | 462-342-316-145-119                                   | N1, N5, N10-(E)-tri- <i>p</i> -coumaroylspermidine or isomer | others     | CT |
| 156              | 9.61  | 1081.5583 | [M-H] <sup>-</sup>    | 0.0  | C55H86O21  | 932-800-637-475-391                                   | (H <sub>2</sub> O-PPT)-Glc-Glc-Xyl-Xyl                       | saponins   | PN |
| 157              | 9.83  | 582.2599  | [M-H] <sup>-</sup>    | -0.9 | C34H37N3O6 | 462-342-316-299-273-145-119                           | N1, N5, N10-(E)-tri- <i>p</i> -coumaroylspermidine or isomer | others     | CT |
| 158 <sup>a</sup> | 9.85  | 1417.6823 | [M+HCOO] <sup>-</sup> | -2.0 | C64H108O31 | 1240-1077-945-783-765-621-553-459-353-221             | noto-T                                                       | saponins   | PN |
| 159              | 10.04 | 1315.6519 | [M+HCOO] <sup>-</sup> | -1.1 | C60H102O28 | 1269-1107-945-783-621-383-221                         | quinquenoside V (PPT-(Glc-Glc)-Glc-Glc-Xyl)                  | saponins   | PN |
| 160 <sup>a</sup> | 10.09 | 845.4896  | [M+HCOO] <sup>-</sup> | -0.4 | C42H72O14  | 799-637-475-391-221                                   | ginsenoside Rf                                               | saponins   | PN |
| 161 <sup>a</sup> | 10.17 | 1285.6405 | [M+HCOO] <sup>-</sup> | -1.9 | C59H100O27 | 1239-1107-1077-945-783-621-353-221                    | noto-R4                                                      | saponins   | PN |
| 162              | 10.27 | 845.4904  | [M+HCOO] <sup>-</sup> | 0.6  | C42H72O14  | 799-637-475-391-323-221                               | notoginsenoside U (PPT-(Glc-Glc))                            | saponins   | PN |
| 163 <sup>a</sup> | 10.34 | 285.0414  | [M-H] <sup>-</sup>    | 5.3  | C15H10O6   | no                                                    | kaempferol                                                   | FOGs       | LC |
| 164              | 10.38 | 1325.6366 | [M-H] <sup>-</sup>    | -0.9 | C62H102O30 | 1281-1240-1221-1107-1089-1077-945-927-783-765-621-459 | PPD-Glc-Glc-Glc-Glc-Xyl-mal                                  | saponins   | PN |

|                  |       |           |                       |      |            |                                                |                                                              |            |    |
|------------------|-------|-----------|-----------------------|------|------------|------------------------------------------------|--------------------------------------------------------------|------------|----|
| 165              | 10.47 | 947.5200  | [M+HCOO] <sup>-</sup> | -1.7 | C46H78O17  | 901-769-475-323-203-191                        | notoginsenoside Rw1/chikusetsusaponin L5 (PPT-(Glc-Xyl)-Xyl) | saponins   | PN |
| 166 <sup>a</sup> | 10.49 | 815.4801  | [M+HCOO] <sup>-</sup> | 1.0  | C41H70O13  | 769-637-475-391-191                            | 20(S)-noto R2                                                | saponins   | PN |
| 167 <sup>a</sup> | 10.50 | 1285.6405 | [M+HCOO] <sup>-</sup> | -1.9 | C59H100O27 | 1239-1107-945-783-621-459-323-263-221          | ginsenoside Ra3                                              | saponins   | PN |
| 168              | 10.57 | 1137.6011 | [M+HCOO] <sup>-</sup> | -4.0 | C54H92O22  | 1091-929-767-605-221                           | notoginsenoside I (PPD-Xyl-Glc-Glc-Glc)                      | saponins   | PN |
| 169 <sup>a</sup> | 10.63 | 1151.5809 | [M+HCOO] <sup>-</sup> | -3.5 | C54H90O23  | 1105-943-781-619-457-323-221                   | 5,6-didehydroginsenoside Rb1                                 | saponins   | PN |
| 170 <sup>a</sup> | 10.82 | 815.4793  | [M+HCOO] <sup>-</sup> | 0.0  | C41H70O13  | 769-637-475-391                                | 20(R)-noto R2                                                | saponins   | PN |
| 171              | 10.85 | 1285.6382 | [M+HCOO] <sup>-</sup> | -3.7 | C59H100O27 | 1239-1107-1077-945-783-621-459-353-221         | notoginsenoside Fa (PPD-(Glc-Glc)-Glc-Glc-Xyl)               | saponins   | PN |
| 172 <sup>a</sup> | 10.89 | 829.4928  | [M+HCOO] <sup>-</sup> | -2.5 | C42H72O13  | 783-637-619-475-391-205                        | 20(S)-ginsenoside Rg2                                        | saponins   | PN |
| 173 <sup>a</sup> | 10.89 | 1153.5977 | [M+HCOO] <sup>-</sup> | -2.5 | C54H92O23  | 1107-945-783-621-459-323-263-221               | Rb1                                                          | saponins   | PN |
| 174 <sup>a</sup> | 11.05 | 683.4360  | [M+HCOO] <sup>-</sup> | -1.5 | C36H62O9   | 637-475-391                                    | 20(S)-Rh1                                                    | saponins   | PN |
| 175              | 11.05 | 1153.5979 | [M+HCOO] <sup>-</sup> | -2.3 | C54H92O23  | 1107-945-783-621-459-323-221                   | Rb1 isomer (PPD-(Glc-Glc)-Glc-Glc)                           | saponins   | PN |
| 176 <sup>a</sup> | 11.14 | 1193.5925 | [M-H] <sup>-</sup>    | -2.5 | C57H94O26  | 1149-1107-1089-945-927-783-765-621-459-323-221 | malonyl ginsenoside Rb1                                      | saponins   | PN |
| 177              | 11.24 | 189.0928  | [M+H] <sup>+</sup>    | 6.3  | C12H12O2   | 152-147-133-129-105-91-77                      | butylidenphthalide isomer                                    | phthalides | LC |
| 178 <sup>a</sup> | 11.25 | 1123.5859 | [M+HCOO] <sup>-</sup> | -3.6 | C53H90O22  | 1077-945-915-783-765-921-459-221-191           | ginsenoside Rc                                               | saponins   | PN |
| 179 <sup>a</sup> | 11.32 | 683.4348  | [M+HCOO] <sup>-</sup> | -3.2 | C36H62O9   | 637-475-391                                    | 20(R)-Rh1                                                    | saponins   | PN |
| 180              | 11.32 | 1193.5912 | [M-H] <sup>-</sup>    | -3.6 | C57H94O26  | 1149-1107-1089-945-927-783-621-459-323-221     | malonyl ginsenoside Rb1 isomer (PPD-(Glc-Glc)-Glc-Glc-mal)   | saponins   | PN |
| 181 <sup>a</sup> | 11.35 | 955.4856  | [M-H] <sup>-</sup>    | -4.9 | C48H76O19  | 793-731-613-569-523-497-455                    | ginsenoside Ro                                               | saponins   | PN |
| 182              | 11.37 | 191.1085  | [M+H] <sup>+</sup>    | 6.8  | C12H14O2   | 191-149-135-107-103-91-79-77                   | 3-butylphthalide or isomer                                   | phthalides | LC |
| 183              | 11.41 | 1087.5287 | [M-H] <sup>-</sup>    | -3.5 | C53H84O23  | 1087-925-745-731-569-551-455                   | OA-GluA-Glc-xyl-Glc                                          | saponins   | PN |

|                  |       |           |                       |      |           |                                        |                                                             |            |    |
|------------------|-------|-----------|-----------------------|------|-----------|----------------------------------------|-------------------------------------------------------------|------------|----|
| 184 <sup>a</sup> | 11.60 | 1123.5850 | [M+HCOO] <sup>-</sup> | -4.5 | C53H90O22 | 1077-945-783-621-459-191               | ginsenoside Rb2                                             | saponins   | PN |
| 185              | 11.64 | 1193.5914 | [M-H] <sup>-</sup>    | -3.4 | C57H94O26 | 1149-1107-1089-945-927-783-621-459-221 | malonyl ginsenoside Rb1 isomer (PPD-(Glc-Glc)-Glc-Glc-mal)  | saponins   | PN |
| 186              | 11.70 | 1123.5853 | [M+HCOO] <sup>-</sup> | -4.2 | C53H90O22 | 1077-945-783-621-459-293-221-191       | notoginsenoside L/ginsenoside Rb3 (PPD-(Glc-Glc)-(Glc-Xyl)) | saponins   | PN |
| 187              | 11.80 | 955.4944  | [M-H] <sup>-</sup>    | 4.3  | C48H76O19 | 777-613-569-523-497-455                | ginsenoside Ro isomer (OA-GluA-Glc-Glc)                     | saponins   | PN |
| 188              | 11.83 | 1193.5963 | [M-H] <sup>-</sup>    | 0.7  | C57H94O26 | 1107-1089-945-783-621-459-221          | malonyl ginsenoside Rb1 isomer (PPD-(Glc-Glc)-Glc-Glc-mal)  | saponins   | PN |
| 189              | 11.88 | 785.4680  | [M+HCOO] <sup>-</sup> | -0.9 | C40H68O12 | 739-607-475-391                        | PPT-Xyl-Xyl                                                 | saponins   | PN |
| 190              | 11.89 | 1123.5879 | [M+HCOO] <sup>-</sup> | -1.9 | C53H90O22 | 1077-945-783-621-459-221-191           | notoginsenoside L/ginsenoside Rb3 (PPD-(Glc-Glc)-(Glc-Xyl)) | saponins   | PN |
| 191              | 11.92 | 1153.6007 | [M+HCOO] <sup>-</sup> | 0.1  | C54H92O23 | 1107-945-783-621-459-221               | Rb1 isomer (PPD-(Glc-Glc)-Glc-Glc)                          | saponins   | PN |
| 192              | 11.98 | 989.5303  | [M+HCOO] <sup>-</sup> | -1.8 | C48H80O18 | 943-781-619-457-221                    | 5,6-didehydroginsenoside Rd (457-(Glc-Glc)-Glc)             | saponins   | PN |
| 193              | 12.08 | 925.4765  | [M-H] <sup>-</sup>    | -3.5 | C47H74O18 | 793-719-613-569-497-455                | OA-GluA-Glc-Xyl                                             | saponins   | PN |
| 194              | 12.13 | 683.4348  | [M+HCOO] <sup>-</sup> | -3.2 | C36H62O9  | 475-391                                | ginsenoside F1 or sanchinoside B1 (PPT-Glc)                 | saponins   | PN |
| 195              | 12.23 | 975.5510  | [M+HCOO] <sup>-</sup> | -1.9 | C48H82O17 | 929-767-605                            | vinaginoside R3 or isomer (PPD-Rha-Glc-Glc)                 | saponins   | PN |
| 196 <sup>a</sup> | 12.40 | 991.5465  | [M+HCOO] <sup>-</sup> | -1.3 | C48H82O18 | 945-783-621-459-375-221                | ginsenoside Rd                                              | saponins   | PN |
| 197              | 12.49 | 965.4940  | [M+HCOO] <sup>-</sup> | -1.8 | C45H76O19 | 919-757-739-595-577-433                | floraginsenoside Kb or isomer ((E-1)-Glc-Glc-Glc)           | saponins   | PN |
| 198 <sup>a</sup> | 12.67 | 1031.5425 | [M-H] <sup>-</sup>    | -0.2 | C51H84O21 | 945-783-765-621-459                    | malonyl ginsenoside Rd                                      | saponins   | PN |
| 199              | 12.72 | 793.4376  | [M-H] <sup>-</sup>    | 0.3  | C42H66O14 | 793-631-569-455                        | OA-GluA-Glc                                                 | saponins   | PN |
| 200              | 12.99 | 1031.5367 | [M-H] <sup>-</sup>    | -5.8 | C51H84O21 | 987-945-825-783-621-459-221            | malonyl ginsenoside Rd isomer (PPD-(Glc-Glc)-Glc-mal)       | saponins   | PN |
| 201              | 13.00 | 205.087   | [M+H] <sup>+</sup>    | 2.4  | C12H12O3  | 187-141-115-91                         | senkyunolide E or isomer                                    | phthalides | LC |
| 202 <sup>a</sup> | 13.16 | 991.5453  | [M+HCOO] <sup>-</sup> | -2.5 | C48H82O18 | 945-621-459-323-221                    | noto-K                                                      | saponins   | PN |

|                  |       |          |                       |      |           |                           |                                                                        |            |    |
|------------------|-------|----------|-----------------------|------|-----------|---------------------------|------------------------------------------------------------------------|------------|----|
| 203              | 13.45 | 961.5349 | [M+HCOO] <sup>-</sup> | -2.4 | C47H80O17 | 915-783-753-621-459       | notoginsenoside Fe/gypenoside IX/notoginsenoside L (PPD-(Glc-Glc)-Xyl) | saponins   | PN |
| 204              | 13.55 | 991.5468 | [M+HCOO] <sup>-</sup> | -1.0 | C48H82O18 | 945-783-621-459           | gypenoside XVII (PPD-Glc-Glc-Glc)                                      | saponins   | PN |
| 205              | 13.57 | 769.4360 | [M-H] <sup>-</sup>    | -1.8 | C40H66O14 | 638-475-457               | pseudoginsenoside Rt3 (PPT-Glc-Xyl)                                    | saponins   | PN |
| 206              | 13.64 | 683.4366 | [M+HCOO] <sup>-</sup> | -0.6 | C36H62O9  | 637-475-391               | ginsenoside F1 or sanchinoside B1 (PPT-Glc)                            | saponins   | PN |
| 207              | 13.80 | 961.5361 | [M+HCOO] <sup>-</sup> | -1.1 | C47H80O17 | 915-783-621-459-375       | notoginsenoside Fe/gypenoside IX/notoginsenoside L (PPD-(Glc-Glc)-Xyl) | saponins   | PN |
| 208              | 13.86 | 961.5370 | [M+HCOO] <sup>-</sup> | -0.2 | C47H80O17 | 915-783-621-459-375-221   | PPD-(Glc-Glc)-Xyl                                                      | saponins   | PN |
| 209              | 13.96 | 279.1603 | [M+H] <sup>+</sup>    | 2.5  | C16H22O4  | 233-205-201-191-149-123   | senkyunolide M                                                         | phthalides | LC |
| 210 <sup>a</sup> | 14.02 | 797.4680 | [M+HCOO] <sup>-</sup> | -0.9 | C41H68O12 | 751-619-457               | noto-T5                                                                | saponins   | PN |
| 211              | 14.38 | 797.4663 | [M+HCOO] <sup>-</sup> | -3.0 | C41H68O12 | 751-619-457               | noto-T5 isomer (457-Glc-Glc)                                           | saponins   | PN |
| 212              | 14.40 | 193.1241 | [M+H] <sup>+</sup>    | 6.2  | C12H16O2  | 147-137-119-105-91-77     | senkyunolide A                                                         | phthalides | LC |
| 213 <sup>a</sup> | 14.90 | 665.4264 | [M+HCOO] <sup>-</sup> | -0.2 | C36H60O8  | 619-457                   | ginsenoside Rk3                                                        | saponins   | PN |
| 214              | 15.03 | 975.5515 | [M+HCOO] <sup>-</sup> | -1.4 | C48H82O17 | 929-783-621-459-375       | vinaginoside R3 isomer (PPD-Glc-Glc-Rha)                               | saponins   | PN |
| 215              | 15.07 | 827.4757 | [M+HCOO] <sup>-</sup> | -4.4 | C42H70O13 | 781-619-439-221           | sanchirrhinoside B isomer (457-(Glc-Glc))                              | saponins   | PN |
| 216              | 15.07 | 925.4792 | [M-H] <sup>-</sup>    | -0.5 | C47H74O18 | 701-523-455               | unknown                                                                | saponins   | PN |
| 217 <sup>a</sup> | 15.38 | 829.4938 | [M+HCOO] <sup>-</sup> | -1.3 | C42H72O13 | 621-537-459               | ginsenoside F2                                                         | saponins   | PN |
| 218              | 15.55 | 261.1864 | [M+H] <sup>+</sup>    | 3.4  | C17H24O2  | 105-77                    | panaxydol                                                              | others     | PN |
| 219              | 15.81 | 925.4789 | [M-H] <sup>-</sup>    | -0.9 | C47H74O18 | 731-569-551-483-455       | OA-GluA-Glc-Xyl                                                        | saponins   | PN |
| 220              | 15.84 | 191.1077 | [M+H] <sup>+</sup>    | 2.6  | C12H14O2  | 173-145-129-115-103-91-77 | ( <i>E</i> )-ligustilide                                               | phthalides | LC |
| 221              | 16.12 | 825.4617 | [M-H] <sup>-</sup>    | -2.3 | C42H68O13 | 779-617-455               | OA-Glc-Glc                                                             | saponins   | PN |
| 222              | 16.14 | 189.0907 | [M+H] <sup>+</sup>    | -4.8 | C12H12O2  | 171-152-128-115-91        | E-butylidenrphthalide                                                  | phthalides | LC |
| 223 <sup>a</sup> | 16.17 | 829.4933 | [M+HCOO] <sup>-</sup> | -1.9 | C42H72O13 | 784-621-459-221           | 20( <i>S</i> )-Rg3                                                     | saponins   | PN |
| 224              | 16.26 | 803.4563 | [M+HCOO] <sup>-</sup> | -2.4 | C43H66O11 | 757-595-433               | ( <i>E</i> -1)-Glc-Glc                                                 | saponins   | PN |
| 225              | 16.26 | 811.4824 | [M+HCOO] <sup>-</sup> | -2.5 | C42H70O12 | 765-603                   | ginsenoside F4 or isomer                                               | saponins   | PN |

|                  |       |          |                       |      |           |                                       |                                               |            |          |
|------------------|-------|----------|-----------------------|------|-----------|---------------------------------------|-----------------------------------------------|------------|----------|
| 226              | 16.29 | 793.4348 | [M-H] <sup>-</sup>    | -3.3 | C42H66O14 | 613-569-509-497-455                   | chikusetsusaponin Iva or isomer (OA-GluA-Glc) | saponins   | PN       |
| 227 <sup>a</sup> | 16.31 | 829.4949 | [M+HCOO] <sup>-</sup> | 0    | C42H72O13 | 783-621-459-375-221                   | 20(R)-Rg3                                     | saponins   | PN       |
| 228              | 16.32 | 313.2391 | [M-H] <sup>-</sup>    | 3.8  | C18H34O4  | 183-129-99                            | 1,18-octadecanedioic acid or isomer           | others     | LC/CT/PN |
| 229              | 16.34 | 195.1387 | [M+H] <sup>+</sup>    | 1.0  | C12H18O2  | 149-79                                | cnidilide or isomer                           | others     | LC       |
| 230 <sup>a</sup> | 16.38 | 191.108  | [M+H] <sup>+</sup>    | 4.2  | C12H14O2  | 173-145-129-117-115-105-91-79         | Z-ligustilide                                 | phthalides | LC       |
| 231              | 16.42 | 311.2239 | [M-H] <sup>-</sup>    | 5.5  | C18H32O4  | 201-171                               | octadecanedioic acid or isomer                | others     | PN       |
| 232              | 16.45 | 313.2394 | [M-H] <sup>-</sup>    | 4.8  | C18H34O4  | 201-171-165-155-127-125               | 1,18-octadecanedioic acid or isomer           | others     | LC/CT/PN |
| 233              | 16.48 | 189.0922 | [M+H] <sup>+</sup>    | 3.2  | C12H12O2  | 171-152-128-115-91                    | (Z)-butylidenrphthalide                       | phthalides | LC       |
| 234 <sup>a</sup> | 16.59 | 521.3850 | [M+HCOO] <sup>-</sup> | 1.5  | C30H52O4  | no                                    | 20(S)-PPT                                     | saponins   | PN       |
| 235              | 16.61 | 311.2228 | [M-H] <sup>-</sup>    | 1.9  | C18H32O4  | 171-                                  | linoleic acid 13-hydroperoxide or isomer      | others     | LC       |
| 236              | 16.63 | 401.2326 | [M+H] <sup>+</sup>    | -0.5 | C24H32O5  | 383-191-149-145-135-105-91            | chuanxiongdiolide B/R2                        | phthalides | LC       |
| 237              | 16.79 | 191.1077 | [M+H] <sup>+</sup>    | 2.6  | C12H14O2  | 191-173-145-129-117-115-105-103-91-79 | 3-butylphthalide isomer                       | phthalides | LC       |
| 238              | 16.79 | 399.2168 | [M+H] <sup>+</sup>    | -0.8 | C24H30O5  | 241-191-173-149-135-117-105-91-79     | chuanxiongnolide A/B                          | phthalides | LC       |
| 239              | 16.93 | 315.2553 | [M-H] <sup>-</sup>    | 5.7  | C18H36O4  | 315-297-279-201-171-141-127           | 9,10-dihydroxyoctadecanoic acid or isomer     | others     | LC/CT/PN |
| 240              | 16.99 | 309.2072 | [M-H] <sup>-</sup>    | 1.9  | C18H30O4  | 171-                                  | linoleic acid 9-hydroperoxide or isomer       | others     | PN       |
| 241              | 17.01 | 401.2325 | [M+H] <sup>+</sup>    | -0.7 | C24H32O5  | 383-191-175-149-135-117-105-91-79     | chuanxiongdiolide B/R2                        | phthalides | LC       |
| 242              | 17.06 | 811.4841 | [M+HCOO] <sup>-</sup> | -0.4 | C42H70O12 | 765-603-556                           | ginsenoside F4 or isomer                      | saponins   | PN       |
| 243              | 17.15 | 811.4850 | [M+HCOO] <sup>-</sup> | 0.7  | C42H70O12 | 765-603                               | ginsenoside F4 or isomer                      | saponins   | PN       |
| 244              | 17.18 | 399.2181 | [M+H] <sup>+</sup>    | 2.5  | C24H30O5  | 191-173-149-145-135-117-105-91-79     | chuanxiongnolide A/B                          | phthalides | LC       |
| 245 <sup>a</sup> | 17.34 | 667.4428 | [M+HCOO] <sup>-</sup> | 1.0  | C36H62O8  | 459-                                  | compound K                                    | saponins   | PN       |
| 246              | 17.37 | 295.2287 | [M-H] <sup>-</sup>    | 4.7  | C18H32O3  | 277-195-171                           | hydroxy-linoleic acid or isomer               | others     | LC/CT/PN |

|                  |       |          |                       |      |                                                |                               |                          |            |    |
|------------------|-------|----------|-----------------------|------|------------------------------------------------|-------------------------------|--------------------------|------------|----|
| 247 <sup>a</sup> | 17.44 | 667.4401 | [M+HCOO] <sup>-</sup> | -3.0 | C <sub>36</sub> H <sub>62</sub> O <sub>8</sub> | 459-375                       | 20( <i>S</i> )-Rh2       | saponins   | PN |
| 248 <sup>a</sup> | 17.54 | 667.4475 | [M+HCOO] <sup>-</sup> | 8.1  | C <sub>36</sub> H <sub>62</sub> O <sub>8</sub> | 459-                          | 20( <i>R</i> )-Rh2       | saponins   | PN |
| 249              | 17.62 | 383.2221 | [M+H] <sup>+</sup>    | -0.3 | C <sub>24</sub> H <sub>30</sub> O <sub>4</sub> | 191-149-135-105-91-79         | senkyunolide P or isomer | phthalides | LC |
| 250 <sup>a</sup> | 18.22 | 381.2067 | [M+H] <sup>+</sup>    | 0.3  | C <sub>24</sub> H <sub>28</sub> O <sub>4</sub> | 191-173-149-135-121-117-91-79 | levistolide A            | phthalides | LC |

<sup>a</sup> the compounds unambiguously identified by comparison with reference standards;

<sup>b</sup> mal stands for the abbreviation of malonyl group.
